# Supplementary material for: Comprehensive analysis of an lncRNA-miRNA-mRNA competing endogenous RNA network in pulpitis
Source: PeerJ. 2019 Jun 17;7:e7135. doi: 10.7717/peerj.7135 (PMC6609876; doi:10.7717/peerj.7135)
Supplement: Supplemental Information 1 [file peerj-07-7135-s001.xlsx]

## Sheet: Differential expressed lncRNA
ID	adj.P.Val	P.Value	t	B	logFC	SEQUENCE	TRANSCRIPT_TYPE	type	seqname	GeneSymbol	source	RNAlength	chrom	strand	txStart	txEnd	Sequence
ASHGA5P037534	0.044815	0.000133507	-5.35664	1.33081	2.52401	TGGGAGTCTATTCTTCTTCCAAAAGTGCAAGCTAAGCCTTCTGAAGATGGTAAAGAACTT	noncoding	noncoding	ENST00000413768	DUXAP8	gencode	2102	chr22	-	16150528	16193004	TGGGAGTCTATTCTTCTTCCAAAAGTGCAAGCTAAGCCTTCTGAAGATGGTAAAGAACTT
ASHGA5P028974	0.0489115	0.000263961	-4.96429	0.708289	2.30812	AGAGTGAGAGATATGTAGTAAAGCAAATATAACAAAATGATGTACAATCTAAGTGGTTGG	noncoding	noncoding	uc010ahe.1	CTD-2314B22.3	UCSC_knowngene	4142	chr14	-	19880208	19925333	AGAGTGAGAGATATGTAGTAAAGCAAATATAACAAAATGATGTACAATCTAAGTGGTTGG
ASHGA5P045031	0.0162134	8.25e-06	-7.10815	3.8001	1.76761	GCCAACAGAGATTTTGAGAAACACATTGAAGGATCTGTTAACACTTGATATACCCAATAA	noncoding	noncoding	ENST00000522875	PVT1	gencode	922	chr8	+	129001506	129108902	GCCAACAGAGATTTTGAGAAACACATTGAAGGATCTGTTAACACTTGATATACCCAATAA
ASHGA5P027591	0.0122514	2.29e-06	-8.01574	4.88543	1.63037	GAGGACAGATGGTAGGACAGAGAGAAGACAGCAAATGGAAAACAAAGGCTGCTATTTTTT	noncoding	noncoding	ENST00000418366	SLC44A3-AS1	gencode	869	chr1	-	95170994	95285775	GAGGACAGATGGTAGGACAGAGAGAAGACAGCAAATGGAAAACAAAGGCTGCTATTTTTT
ASHGA5P020761	0.044815	0.000121602	-5.41137	1.41569	1.61988	TGGGCTTGAGAATCCTGTTACACCTGGGATTTAGGCACTTTCAATCTGAAAAAATACATA	noncoding	noncoding	ENST00000519481	PVT1	gencode	542	chr8	+	128902922	129008896	TGGGCTTGAGAATCCTGTTACACCTGGGATTTAGGCACTTTCAATCTGAAAAAATACATA
ASHGA5P035240	0.044815	0.000175398	-5.19811	1.08222	1.45122	TTAAACAGCTACACCACCAGAAGCCGAGAGAGAGGCTGGAACATAGCCTTCCCTTTGGAG	noncoding	noncoding	ENST00000442293	MIR4435-2HG	gencode	546	chr2	-	112186899	112237838	TTAAACAGCTACACCACCAGAAGCCGAGAGAGAGGCTGGAACATAGCCTTCCCTTTGGAG
ASHGA5P025694	0.0270466	2.31e-05	-6.42782	2.90141	1.13066	CTTGTGACAGAGAGAGAGAGAGAAGCAGAGAGAGAGTTTTTATAAGGAATTGGCTCACAT	noncoding	noncoding	NR_027074	LINC00928	RefSeq	2366	chr15	-	90048160	90067265	CTTGTGACAGAGAGAGAGAGAGAAGCAGAGAGAGAGTTTTTATAAGGAATTGGCTCACAT
ASHGA5P054521	0.0473803	0.000221235	-5.06478	0.870051	1.06584	GGGTTTTAATACAGACAAATCAACTCAATCAAAGAAACCAACTCAAAGAAAGATGGGTCT	noncoding	noncoding	NR_024397	NUTM2A-AS1	RefSeq	825	chr10	-	88998423	89102315	GGGTTTTAATACAGACAAATCAACTCAATCAAAGAAACCAACTCAAAGAAAGATGGGTCT
ASHGA5P047448	0.044815	0.000134034	5.35434	1.32723	-1.02875	AACCTGCACCATCTTTTTCTAGTGTAAAAATTACAATATCTGAAGTGAAACTACTAGAAT	noncoding	noncoding	ENST00000433152	LINC01515	gencode	744	chr10	+	67345445	67441220	AACCTGCACCATCTTTTTCTAGTGTAAAAATTACAATATCTGAAGTGAAACTACTAGAAT
ASHGA5P045586	0.044815	9.78e-05	5.53977	1.61287	-1.15832	TTGAAACCTGCTGGGACTTTTTAGCCATTCTCTTCAACATAAAGAATGGGTGTTTTTGGA	noncoding	noncoding	uc003zfx.3	RP11-143M1.2	UCSC_knowngene	532	chr9	+	72697	75294	TTGAAACCTGCTGGGACTTTTTAGCCATTCTCTTCAACATAAAGAATGGGTGTTTTTGGA
ASHGA5P013986	0.0270466	2.4e-05	6.40483	2.86971	-1.16111	GCTCACAAAGGGCTAATCTCGGGCCTTGTCGAAGGAAGAGGCTGCAGACGTTAATGAGGT	noncoding	noncoding	NR_046467	MEG3	RefSeq	1793	chr14	+	101292444	101327360	GCTCACAAAGGGCTAATCTCGGGCCTTGTCGAAGGAAGAGGCTGCAGACGTTAATGAGGT
ASHGA5P042184	0.0142718	6.05e-06	7.32157	4.06669	-1.18808	CGTTTCTTTAGTCAAATCTCCTTTTCTATAAAATGGAGACGGCTTTCATATGTTTGGGAA	noncoding	noncoding	ENST00000456585	KIF25-AS1	gencode	2795	chr6	-	168393501	168397757	CGTTTCTTTAGTCAAATCTCCTTTTCTATAAAATGGAGACGGCTTTCATATGTTTGGGAA
ASHGA5P051422	0.036578	6.26e-05	5.80755	2.0153	-1.20775	ACACCAGAACAAAAATAAATAAATAAAAGAATCTTCCAGAAATTCATGAAGAGACTTCAG	noncoding	noncoding	ENST00000456253	SATB1-AS1	gencode	540	chr3	+	18507446	18568819	ACACCAGAACAAAAATAAATAAATAAAAGAATCTTCCAGAAATTCATGAAGAGACTTCAG
ASHGA5P045076	0.0459724	0.000205327	5.10748	0.938311	-1.20956	CTGCAATATTCTTCTTTGGGAAGTACAATGCCAAGTAAATAAAGATATTTGGGGTCATTC	noncoding	noncoding	NR_015445	BREA2	RefSeq	1002	chr8	+	144779284	144780583	CTGCAATATTCTTCTTTGGGAAGTACAATGCCAAGTAAATAAAGATATTTGGGGTCATTC
ASHGA5P042185	0.012572	2.64e-06	7.91022	4.76561	-1.21988	GAGTAGCCAAAATGCTGTGGCATTCTTAGAAATGAAGAAAGAACTGAACTGATAAGACAA	noncoding	noncoding	uc003qwj.3	KIF25-AS1	UCSC_knowngene	1409	chr6	-	168394862	168397757	GAGTAGCCAAAATGCTGTGGCATTCTTAGAAATGAAGAAAGAACTGAACTGATAAGACAA
ASHGA5P015984	0.0461788	0.000211493	5.09054	0.911253	-1.22279	GATGTCCAAAGACATGAAAATTTCCAGGCTGACAAATAATTTCGCTGTCATCGGTCAAGA	noncoding	noncoding	ENST00000425438	AFDN-DT	gencode	311	chr6	-	168224789	168225454	GATGTCCAAAGACATGAAAATTTCCAGGCTGACAAATAATTTCGCTGTCATCGGTCAAGA
ASHGA5P039320	0.0454162	0.000191678	5.14697	1.00118	-1.22822	CACCTCAAAAAGAATTGTCTCTTGGTATGAGTGGAATGGAATAAAATACATGGAAACCCA	noncoding	noncoding	ENST00000515205	LINC02482	gencode	422	chr4	-	6672451	6675557	CACCTCAAAAAGAATTGTCTCTTGGTATGAGTGGAATGGAATAAAATACATGGAAACCCA
ASHGA5P044372	0.0473803	0.000238344	5.02229	0.80185	-1.23015	CCTCACAAAATGAAGTCTGGGGATATGTCAAGATAAATGATTGTTCTTTTCTGTCTTTCT	noncoding	noncoding	ENST00000517697	CA3-AS1	gencode	559	chr8	-	86354079	86376562	CCTCACAAAATGAAGTCTGGGGATATGTCAAGATAAATGATTGTTCTTTTCTGTCTTTCT
ASHGA5P035796	0.044815	0.000127567	5.38328	1.37218	-1.27209	CTGCTATGACTGTGGACTTTCTATTGCATTCACATAATAAAATCATGCGACATTGTTTTG	noncoding	noncoding	NR_027097	LINC00486	RefSeq	1392	chr2	+	33152193	33171202	CTGCTATGACTGTGGACTTTCTATTGCATTCACATAATAAAATCATGCGACATTGTTTTG
ASHGA5P050409	0.0473803	0.000232525	5.03638	0.824489	-1.33231	CGGGGCTGCTGACGTCATCTGCAGGCCCTGGAGACGCGACTGCAGTTACCGAGTTTCTAA	noncoding	noncoding	NR_034113	DNAJC27-AS1	RefSeq	4695	chr2	+	25194980	25262563	CGGGGCTGCTGACGTCATCTGCAGGCCCTGGAGACGCGACTGCAGTTACCGAGTTTCTAA
ASHGA5P051446	0.044815	0.000176042	5.196	1.07888	-1.42235	TAGATATCTTATTGTTTTGAATTTCTAATTAAATACTACTGTGGCCATAGCATATACTCT	noncoding	noncoding	NR_036540	LINC00622	RefSeq	1610	chr1	-	120140324	120141914	TAGATATCTTATTGTTTTGAATTTCTAATTAAATACTACTGTGGCCATAGCATATACTCT
ASHGA5P019960	0.044815	9.32e-05	5.56836	1.6564	-1.42647	GGGACACCAGTTCATGTCAGAGATGCATACAGAAGTACTTATGGGTAAAATGCATGATAT	noncoding	noncoding	NR_033859	LOC574538	RefSeq	2907	chr12	-	246576	258332	GGGACACCAGTTCATGTCAGAGATGCATACAGAAGTACTTATGGGTAAAATGCATGATAT
ASHGA5P029679	0.0497996	0.000279554	4.93179	0.65564	-1.47061	GTATGAAAACACTCGATATTTGCTGAGGATGGAGACTGCAGCCAACTCAACAACTTCTCT	noncoding	noncoding	NR_052025	SLIRP	RefSeq	531	chr14	+	78174413	78183941	GTATGAAAACACTCGATATTTGCTGAGGATGGAGACTGCAGCCAACTCAACAACTTCTCT
ASHGA5P037444	0.044815	0.000156396	5.26448	1.18679	-1.63804	AGTACTAGTCACTCTTGACTGTGGTTTATGTTGTTTCAATAAAGTAGCTTTCCTTCTCAA	noncoding	noncoding	NR_038880	PAXBP1-AS1	RefSeq	2946	chr21	+	34100424	34105224	AGTACTAGTCACTCTTGACTGTGGTTTATGTTGTTTCAATAAAGTAGCTTTCCTTCTCAA
ASHGA5P042513	0.0336299	5.02e-05	5.94237	2.21339	-1.63884	CAAAACCAAACACTCAGATCATCAACAGCAAACAAAATTGTGAATGTTTTTACTGCACAC	noncoding	noncoding	NR_040671	HMGN3-AS1	RefSeq	2993	chr6	+	79943390	79946517	CAAAACCAAACACTCAGATCATCAACAGCAAACAAAATTGTGAATGTTTTTACTGCACAC
ASHGA5P017727	0.044815	0.000140506	5.32681	1.28434	-1.70137	AGGTAAGCTGATGTGCCTGAGACAGGTTTGACCAGGCAACTGAAAAGATATCCCTAAGAG	noncoding	noncoding	ENST00000445151	LINC01598	gencode	719	chr20	-	29558487	29570363	AGGTAAGCTGATGTGCCTGAGACAGGTTTGACCAGGCAACTGAAAAGATATCCCTAAGAG
ASHGA5P044493	0.044815	9.86e-05	5.53492	1.60547	-1.80163	GGGAGAGTGTACAAAATATGTTACCAAACCTATCAAAAGCAAGCCATGCAATAAAAAATG	noncoding	noncoding	ENST00000521048	MAL2-AS1	gencode	575	chr8	-	120236043	120259083	GGGAGAGTGTACAAAATATGTTACCAAACCTATCAAAAGCAAGCCATGCAATAAAAAATG

## Sheet: Differential expressed mRNA
ID	adj.P.Val	P.Value	t	B	logFC	gene_symbol	change
16914171	4.56e-10	8.51e-15	38.6431	19.6721	4.7384	PI3	UP
16900100	6.35e-08	2.37e-12	24.9153	16.7968	6.75316	IGKC	UP
17093543	9.08e-08	5.08e-12	23.4644	16.3074	4.78949	CCL21	UP
16863287	1.18e-07	8.81e-12	22.4697	15.9407	2.40535	FOSB	UP
16697370	2.73e-07	2.54e-11	20.6659	15.2019	2.44222	PTGS2	UP
16849400	4.38e-07	4.9e-11	19.618	14.7234	2.76733	SOCS3	UP
16696251	4.97e-07	6.49e-11	19.1842	14.5137	3.33662	SELE	UP
17070492	6.71e-07	1.13e-10	18.3618	14.0956	2.55496	ATP6V0D2	UP
16716371	2.34e-06	4.81e-10	16.3456	12.945	2.66844	CH25H	UP
16732985	2.64e-06	5.9e-10	16.0779	12.7774	1.80129	SLC37A2	UP
16869023	2.83e-06	7.15e-10	15.8308	12.6192	2.99268	ACP5	UP
17070120	2.83e-06	7.76e-10	-15.7266	12.5515	-1.94632	CRISPLD1	DOWN
16914395	2.83e-06	8.15e-10	15.665	12.5112	4.67496	MMP9	UP
16797444	3.63e-06	1.25e-09	15.1316	12.1532	4.39915	IGHG1	UP
16667530	5.63e-06	2.1e-09	14.5084	11.7136	1.6205	PALMD	UP
16834091	6.22e-06	2.44e-09	14.3336	11.586	1.68437	IGFBP4	UP
16818394	7.06e-06	2.98e-09	14.1013	11.4133	2.30414	AHSP	UP
16722278	7.06e-06	3.03e-09	-14.0812	11.3982	-1.93253	SPON1	DOWN
16934836	7.11e-06	3.34e-09	13.9684	11.3129	1.87407	LGALS2	UP
16924602	7.11e-06	3.38e-09	13.9549	11.3026	1.60181	ADAMTS1	UP
16874005	7.11e-06	3.58e-09	-13.8905	11.2535	-1.67057	DBP	DOWN
16982047	7.8e-06	4.08e-09	13.7437	11.1405	1.50758	ACSL1	UP
16989736	9.47e-06	5.51e-09	13.4076	10.876	2.47748	EGR1	UP
16938378	9.47e-06	5.65e-09	-13.38	10.854	-1.5857	NR1D2	DOWN
16847760	9.54e-06	5.87e-09	13.3384	10.8206	1.28098	ICAM2	UP
17023658	1.07e-05	6.89e-09	-13.1642	10.6795	-1.73574	MOXD1	DOWN
16767422	1.07e-05	6.96e-09	13.152	10.6696	1.2878	PTPRB	UP
16688799	1.79e-05	1.21e-08	12.5653	10.1771	1.32765	ADGRL4	UP
16870193	1.79e-05	1.29e-08	12.4952	10.1166	1.25712	PLVAP	UP
16713318	1.79e-05	1.31e-08	12.4834	10.1064	2.0385	NAMPT	UP
16780929	1.79e-05	1.36e-08	12.4427	10.071	1.43441	COL4A1	UP
17000641	1.86e-05	1.46e-08	12.3709	10.0082	1.50282	ECSCR	UP
16976821	1.97e-05	1.58e-08	12.291	9.93781	2.32392	PPBP	UP
16944251	2.03e-05	1.69e-08	-12.2199	9.87475	-2.06451	GAP43	DOWN
17122664	2.03e-05	1.7e-08	12.2145	9.86991	1.53391	CYTOR	UP
17080099	2.03e-05	1.74e-08	-12.1934	9.85111	-1.57474	RSPO2	DOWN
17095899	2.27e-05	2.03e-08	-12.0346	9.70852	-1.25511	ECM2	DOWN
16919962	2.28e-05	2.09e-08	12.0092	9.6855	1.59563	SULF2	UP
16692362	2.32e-05	2.21e-08	11.953	9.63435	2.04032	GJA5	UP
16676983	2.86e-05	2.82e-08	11.7098	9.41016	2.75296	G0S2	UP
17009627	2.86e-05	2.83e-08	-11.7085	9.40886	-1.26007	RN7SK	DOWN
17044177	2.87e-05	2.89e-08	11.6867	9.38855	2.11878	IL6	UP
16906285	2.95e-05	3.05e-08	11.6339	9.33905	1.25809	CALCRL	UP
17000644	2.95e-05	3.11e-08	11.6153	9.32156	1.54888	ECSCR	UP
16786587	2.95e-05	3.16e-08	11.5994	9.30663	3.31142	FOS	UP
16672428	3.27e-05	3.6e-08	11.4735	9.1873	1.59608	ACKR1	UP
17020268	3.4e-05	3.85e-08	-11.4086	9.12519	-1.14554	COL21A1	DOWN
16966855	3.4e-05	3.87e-08	-11.4043	9.12112	-1.03799	KIT	DOWN
16984365	3.44e-05	3.98e-08	-11.3772	9.09508	-1.27226	GHR	DOWN
16819257	3.62e-05	4.26e-08	11.312	9.03215	4.21744	MT1H	UP
16977052	3.76e-05	4.49e-08	11.2608	8.98247	2.71617	CXCL10	UP
17000208	3.77e-05	4.57e-08	-11.2458	8.9678	-2.03051	VTRNA2-1	DOWN
16819794	3.77e-05	4.64e-08	11.2311	8.95353	1.69072	CDH5	UP
16684310	4.05e-05	5.06e-08	11.1494	8.87352	2.23529	LAPTM5	UP
16716350	4.21e-05	5.33e-08	11.0992	8.82397	1.34622	ACTA2	UP
17126208	4.36e-05	5.72e-08	-11.0334	8.75886	-1.24649	ADAM12	DOWN
16858710	4.36e-05	5.77e-08	11.0249	8.75038	2.11814	JUNB	UP
16781536	4.5e-05	6.05e-08	10.9815	8.70715	1.3869	PNP	UP
17087430	4.62e-05	6.29e-08	10.9451	8.67071	1.40362	COL15A1	UP
16721585	4.73e-05	6.53e-08	-10.9106	8.63604	-1.29904	OLFML1	DOWN
16961331	4.87e-05	6.81e-08	10.8724	8.59762	1.44107	MECOM	UP
17101111	5.1e-05	7.52e-08	10.7803	8.50418	1.34579	IL3RA	UP
16957363	5.23e-05	7.89e-08	10.7363	8.45936	1.85081	BTLA	UP
17066897	5.81e-05	8.99e-08	10.6183	8.33797	1.08287	SLC25A37	UP
16998162	5.98e-05	9.36e-08	10.5815	8.29986	1.79202	MCTP1	UP
16732891	5.98e-05	9.48e-08	10.5699	8.28783	1.73102	NRGN	UP
16795965	6.38e-05	1.02e-07	10.5022	8.21726	1.2567	FBLN5	UP
16836260	6.41e-05	1.04e-07	-10.487	8.20135	-1.34392	HLF	DOWN
17011708	7.53e-05	1.25e-07	10.3239	8.0292	1.85909	SLC16A10	UP
16900136	7.53e-05	1.25e-07	10.3233	8.02858	3.02019	IGKC	UP
16907281	7.84e-05	1.32e-07	-10.2775	7.97971	-1.24144	C2CD6	DOWN
16874533	7.91e-05	1.37e-07	10.2434	7.94325	1.65483	NAPSB	UP
16658536	7.91e-05	1.38e-07	-10.2335	7.93265	-1.55845	PER3	DOWN
17078943	7.91e-05	1.39e-07	-10.2318	7.93086	-2.24955	CALB1	DOWN
16878994	8.54e-05	1.51e-07	10.155	7.84812	1.28633	RASGRP3	UP
16818272	8.64e-05	1.55e-07	10.1364	7.82791	3.31083	ITGAX	UP
16828344	8.96e-05	1.63e-07	10.0929	7.78075	1.51836	MLKL	UP
16839177	8.96e-05	1.64e-07	10.0865	7.77379	1.27845	METRNL	UP
16840846	9.29e-05	1.75e-07	-10.0314	7.71365	-1.26279	PER1	DOWN
17007543	9.29e-05	1.76e-07	10.0244	7.70595	1.33418	ITPR3	UP
16813206	9.29e-05	1.77e-07	10.0208	7.70208	2.53487	ANPEP	UP
17019056	9.29e-05	1.77e-07	10.0207	7.70187	3.00225	TREM1	UP
16670479	9.63e-05	1.85e-07	-9.9815	7.65891	-2.26006	CIART	DOWN
17078134	0.000105	2.04e-07	-9.89881	7.56761	-1.28356	EYA1	DOWN
16731654	0.000108	2.16e-07	9.84725	7.51032	1.28058	TAGLN	UP
16867349	0.000108	2.17e-07	9.84586	7.50877	1.50271	SEMA6B	UP
17087517	0.000109	2.21e-07	9.82714	7.48789	2.48753	NR4A3	UP
16705507	0.000115	2.38e-07	9.76688	7.42043	1.77262	SRGN	UP
17119058	0.000115	2.4e-07	-9.75946	7.4121	-1.11484	MIR4521	DOWN
17125960	0.000118	2.52e-07	9.71669	7.36394	1.79668	PECAM1	UP
16859763	0.000123	2.68e-07	9.66627	7.30691	2.50082	IFI30	UP
16919158	0.000123	2.71e-07	9.6557	7.29492	1.28619	TGM2	UP
16763577	0.000124	2.78e-07	-9.63385	7.27009	-1.27154	SLC38A4	DOWN
17068296	0.00013	2.95e-07	9.58526	7.21469	1.67429	IDO1	UP
16967875	0.00013	3.02e-07	9.56671	7.19347	1.72397	PARM1	UP
16998682	0.000131	3.04e-07	-9.55944	7.18514	-1.4514	EFNA5	DOWN
17044382	0.000134	3.15e-07	-9.53222	7.15392	-1.35193	MPP6	DOWN
16698356	0.000135	3.21e-07	9.51622	7.13552	1.40806	PIK3C2B	UP
16829085	0.000137	3.29e-07	9.49513	7.11122	2.61984	SLC7A5	UP
17025267	0.000143	3.52e-07	9.43852	7.04577	1.66209	SOD2	UP
16921428	0.000143	3.59e-07	9.424	7.02892	1.43114	SOX18	UP
17028909	0.000143	3.61e-07	9.41903	7.02315	1.04604	IER3	UP
17031687	0.000143	3.61e-07	9.41903	7.02315	1.04604	IER3	UP
17034143	0.000143	3.61e-07	9.41903	7.02315	1.04604	IER3	UP
17041752	0.000143	3.61e-07	9.41903	7.02315	1.04604	IER3	UP
16695406	0.00015	3.81e-07	9.3738	6.97049	1.856	CD84	UP
17004710	0.000154	3.95e-07	9.344	6.93566	1.6543	TFAP2A-AS1	UP
16833204	0.000154	4.03e-07	9.32722	6.91602	1.63897	CCL2	UP
17006614	0.000154	4.1e-07	9.31417	6.9007	1.77831	HCG26	UP
16742124	0.000154	4.12e-07	9.31094	6.89692	1.43819	CHRDL2	UP
16859314	0.000161	4.41e-07	9.25521	6.8313	1.35839	KLF2	UP
17006666	0.000161	4.47e-07	9.24428	6.81839	1.50905	LST1	UP
16777527	0.000161	4.47e-07	-9.24427	6.81838	-1.29235	TPTE2P1	DOWN
16968653	0.000163	4.58e-07	9.22427	6.79473	1.76636	IBSP	UP
16821621	0.000163	4.59e-07	9.22158	6.79154	1.8855	IRF8	UP
17000525	0.000164	4.66e-07	-9.21074	6.77869	-1.51783	LRRTM2	DOWN
17019749	0.000164	4.68e-07	9.20633	6.77346	1.23061	ADGRF5	UP
16770590	0.000165	4.74e-07	9.19614	6.76137	2.28283	SDS	UP
16665796	0.000166	4.81e-07	9.18446	6.74749	1.43665	SGIP1	UP
17102977	0.000176	5.13e-07	-9.13286	6.68599	-1.6447	RGN	DOWN
16775136	0.000189	5.53e-07	9.07211	6.61318	2.01736	PCDH17	UP
17044862	0.000189	5.59e-07	9.06402	6.60346	1.19723	AQP1	UP
16867784	0.000189	5.6e-07	9.06211	6.60116	2.97309	C3	UP
17017018	0.000192	5.76e-07	9.04018	6.57475	1.22394	IER3	UP
17019805	0.000194	5.85e-07	9.02764	6.55962	1.42966	TNFRSF21	UP
17096728	0.000206	6.3e-07	8.96821	6.48765	1.80129	ABCA1	UP
16685295	0.000209	6.46e-07	8.94884	6.4641	2.51155	CSF3R	UP
17004903	0.000209	6.51e-07	8.94279	6.45674	1.64916	EDN1	UP
16730522	0.000212	6.65e-07	8.92504	6.4351	1.52968	BIRC3	UP
16998044	0.000212	6.67e-07	8.92267	6.43221	1.94947	LUCAT1	UP
16684144	0.000223	7.12e-07	8.87213	6.37041	2.04565	PTAFR	UP
16960642	0.000241	7.91e-07	-8.78941	6.26856	-1.54049	ARHGEF26-AS1	DOWN
17050522	0.000247	8.34e-07	8.748	6.21727	1.30395	TES	UP
16705381	0.000247	8.45e-07	-8.73784	6.20466	-1.25525	TET1	DOWN
17115868	0.000247	8.48e-07	8.73477	6.20084	1.19183	IL3RA	UP
16672362	0.000247	8.49e-07	8.73423	6.20017	1.83413	MNDA	UP
16927696	0.000247	8.53e-07	8.7305	6.19553	2.74404	IGLC1	UP
16851309	0.000251	8.8e-07	-8.70634	6.16546	-1.47992	GREB1L	DOWN
17122646	0.000257	9.09e-07	8.68087	6.13367	1.53374	MIR4435-2HG	UP
16693414	0.000257	9.16e-07	8.67496	6.12629	1.18867	S100A8	UP
16835042	0.00026	9.41e-07	8.65396	6.1	1.01933	KANSL1-AS1	UP
16686271	0.000265	9.67e-07	8.63266	6.07329	2.07313	RNU5F-1	UP
17113346	0.000272	1.01e-06	-8.59938	6.03144	-1.6613	CHRDL1	DOWN
17080648	0.000272	1.02e-06	8.59506	6.02599	1.51418	HAS2	UP
16793585	0.000285	1.09e-06	-8.54402	5.96151	-1.34172	C14orf39	DOWN
17030627	0.000285	1.09e-06	8.54044	5.95697	1.56265	LST1	UP
17035425	0.000285	1.09e-06	8.54044	5.95697	1.56265	LST1	UP
16955815	0.000285	1.1e-06	-8.53739	5.95311	-1.5361	LOC105377123	DOWN
17058719	0.000288	1.11e-06	8.5268	5.93968	2.24878	NCF1C	UP
17038124	0.000289	1.12e-06	8.52007	5.93113	1.52858	LST1	UP
16714104	0.000294	1.15e-06	8.50178	5.90789	1.16286	TMEM273	UP
17088037	0.000296	1.16e-06	-8.49447	5.8986	-1.18332	MUSK	DOWN
17027801	0.000305	1.22e-06	8.45751	5.85146	1.53478	LST1	UP
17033344	0.000305	1.22e-06	8.45751	5.85146	1.53478	LST1	UP
16697196	0.000305	1.22e-06	8.45541	5.84877	1.40049	FAM129A	UP
17026272	0.000305	1.22e-06	8.45225	5.84475	1.55123	LST1	UP
16904278	0.000311	1.26e-06	8.43167	5.81841	1.11996	DPP4	UP
16672412	0.000322	1.31e-06	8.39867	5.77607	1.13363	CADM3	UP
17002846	0.000323	1.33e-06	8.39174	5.76716	1.87403	DUSP1	UP
16874945	0.000326	1.35e-06	8.38087	5.75318	2.38333	FPR1	UP
16722890	0.000334	1.38e-06	-8.35927	5.72534	-1.62025	ANO5	DOWN
17056984	0.000343	1.44e-06	8.33109	5.68894	1.77938	INHBA	UP
16778849	0.000346	1.47e-06	8.31577	5.66909	1.75976	LCP1	UP
17040719	0.000348	1.48e-06	8.3097	5.66123	1.56631	LST1	UP
16666336	0.00035	1.49e-06	-8.30165	5.65079	-1.41208	ST6GALNAC5	DOWN
16735545	0.00035	1.5e-06	8.29784	5.64585	1.38417	NRIP3	UP
16978054	0.000356	1.54e-06	-8.27894	5.6213	-1.05754	UNC5C	DOWN
17088760	0.000376	1.65e-06	8.2283	5.55527	1.13038	PTGS1	UP
16864756	0.000377	1.67e-06	8.2205	5.54507	2.08851	FPR3	UP
16957986	0.000379	1.7e-06	8.20616	5.52631	1.93133	HCLS1	UP
17121622	0.000395	1.77e-06	8.17352	5.48347	1.28911	LGALS9	UP
16976844	0.000398	1.8e-06	8.16444	5.47154	2.49324	CXCL2	UP
16903897	0.000408	1.85e-06	8.14271	5.44292	1.83148	NR4A2	UP
16796694	0.000412	1.88e-06	8.1326	5.4296	1.02088	WARS	UP
16871221	0.000414	1.9e-06	-8.1231	5.41705	-1.29494	SLC7A10	DOWN
16762154	0.000414	1.91e-06	8.1207	5.41389	1.09305	ABCC9	UP
16949439	0.00044	2.07e-06	-8.06127	5.33514	-1.30882	LOC101929130	DOWN
16962911	0.00044	2.07e-06	8.06068	5.33435	2.03272	LRRC15	UP
17115782	0.000444	2.13e-06	8.03744	5.30343	1.11035	CLIC2	UP
16932321	0.000444	2.14e-06	8.03526	5.30053	1.25149	CLDN5	UP
16912900	0.000444	2.15e-06	-8.03376	5.29852	-1.32556	ASIP	DOWN
16671139	0.000462	2.24e-06	8.00241	5.25668	1.71085	S100A9	UP
16888963	0.000468	2.29e-06	7.98722	5.23637	1.89043	NABP1	UP
16997816	0.000468	2.3e-06	-7.98407	5.23215	-1.55124	EDIL3	DOWN
17072601	0.000474	2.34e-06	7.96897	5.21192	1.63663	TRIB1	UP
16929677	0.000481	2.39e-06	7.95526	5.19351	2.22518	CSF2RB	UP
16761212	0.000522	2.61e-06	7.89092	5.10683	1.35087	CLEC2B	UP
16780592	0.000526	2.65e-06	7.88017	5.09228	2.34602	GPR183	UP
16888979	0.000533	2.7e-06	7.86664	5.07397	2.31774	LOC105747689	UP
16944647	0.000533	2.7e-06	7.86503	5.07179	1.73862	CSTA	UP
16998293	0.000536	2.74e-06	7.85655	5.0603	1.17855	GLRX	UP
17095703	0.000537	2.75e-06	7.85215	5.05432	1.16243	NFIL3	UP
17039184	0.000538	2.78e-06	7.84497	5.04458	1.1743	IER3	UP
16814137	0.000541	2.8e-06	7.83931	5.03689	1.70922	HBQ1	UP
16900120	0.000541	2.83e-06	7.8311	5.02573	4.29825	IGKC	UP
16890837	0.000541	2.84e-06	7.83042	5.02481	2.16851	SLC11A1	UP
17121624	0.000541	2.84e-06	7.82904	5.02293	1.30225	LGALS9	UP
16695677	0.000542	2.86e-06	7.82414	5.01626	1.12708	MPZ	UP
16843567	0.000552	2.95e-06	7.80189	4.98595	1.81537	CCL23	UP
17120636	0.000552	2.95e-06	7.80172	4.98572	1.06126	PCSK7	UP
16797353	0.000559	3e-06	7.78935	4.96885	2.9742	IGHG4	UP
17027082	0.000562	3.03e-06	7.78364	4.96104	1.48332	HLA-DRB3	UP
16855810	0.000564	3.05e-06	7.77799	4.95333	1.63733	CD226	UP
17104279	0.000565	3.07e-06	7.77457	4.94865	1.58748	MIR223	UP
16841083	0.000566	3.08e-06	7.77121	4.94406	1.73516	PIK3R5	UP
16668702	0.000568	3.11e-06	7.76556	4.93632	1.76528	C1orf162	UP
16754536	0.000601	3.33e-06	-7.71543	4.86755	-1.52626	SYT1	DOWN
16819848	0.000601	3.34e-06	7.71353	4.86494	1.53084	CMTM2	UP
16738007	0.000609	3.4e-06	7.70152	4.84841	1.45406	SPI1	UP
16844312	0.000616	3.45e-06	7.69144	4.83452	1.44523	TOP2A	UP
16760928	0.000622	3.49e-06	7.68212	4.82165	2.51599	CLEC4E	UP
16875448	0.000628	3.54e-06	7.67305	4.80913	2.23159	LILRA5	UP
16969686	0.000632	3.58e-06	7.66336	4.79575	1.14422	MCUB	UP
16696120	0.000642	3.66e-06	-7.64853	4.77523	-1.54626	DPT	DOWN
16672505	0.000644	3.69e-06	-7.64341	4.76813	-1.30407	ATP1A2	DOWN
16671457	0.000648	3.72e-06	7.63603	4.75791	1.21747	IL6R	UP
16710548	0.000656	3.78e-06	7.62595	4.74393	1.32755	PTPRE	UP
17056791	0.000669	3.93e-06	7.598	4.70509	2.12484	SFRP4	UP
16664005	0.000669	3.94e-06	7.59557	4.70171	1.18577	PLK3	UP
17077191	0.000675	3.99e-06	-7.58721	4.69006	-1.15751	LOC100507516	DOWN
17095991	0.000681	4.04e-06	-7.57882	4.67838	-1.42262	BARX1	DOWN
16796313	0.000685	4.09e-06	-7.5705	4.66677	-1.00963	GSC	DOWN
16690019	0.000703	4.21e-06	-7.54978	4.63782	-2.12103	PLPPR5	DOWN
16837348	0.000706	4.24e-06	-7.54448	4.63042	-1.21031	MAP2K6	DOWN
16704690	0.000718	4.34e-06	7.52826	4.60771	1.55023	WDFY4	UP
16677391	0.000748	4.59e-06	7.48875	4.55223	1.28155	PROX1	UP
16927785	0.00076	4.68e-06	7.47562	4.53375	3.63683	IGLL5	UP
17042519	0.000777	4.8e-06	7.45814	4.50911	1.22943	HLA-DMA	UP
16837101	0.000777	4.82e-06	-7.45543	4.50529	-1.01531	RGS9	DOWN
16830577	0.000786	4.89e-06	7.44419	4.48942	1.43164	CD68	UP
17059861	0.000788	4.92e-06	-7.44039	4.48405	-1.61133	COL1A2-AS1	DOWN
16837587	0.000792	4.97e-06	7.4329	4.47346	1.88445	CD300A	UP
16900132	0.000792	4.99e-06	7.43084	4.47054	3.20966	IGKC	UP
16978779	0.000792	4.99e-06	7.43071	4.47036	1.31549	DKK2	UP
16836624	0.000819	5.23e-06	7.39844	4.42463	2.86309	MIR21	UP
16952414	0.000832	5.34e-06	7.38351	4.40342	1.41543	CSRNP1	UP
16967771	0.000835	5.38e-06	7.37909	4.39714	5.1657	CXCL8	UP
16800680	0.000843	5.44e-06	7.37056	4.38501	1.63737	SQOR	UP
16743797	0.000865	5.6e-06	-7.35133	4.3576	-1.2773	LOC105369464	DOWN
17061545	0.000877	5.71e-06	7.33782	4.33832	1.45272	NAMPT	UP
16869684	0.000878	5.75e-06	7.33289	4.33129	2.34698	ADGRE2	UP
16736942	0.000889	5.83e-06	-7.3224	4.31629	-1.05174	MPPED2	DOWN
16672893	0.000904	5.97e-06	7.30637	4.29335	1.41357	FCGR2A	UP
16691333	0.000904	6e-06	7.30267	4.28806	1.26997	CASQ2	UP
17006949	0.000904	6.02e-06	7.30058	4.28506	1.45849	CFB	UP
16745281	0.000922	6.2e-06	7.28023	4.25587	1.19358	MCAM	UP
17058968	0.000922	6.24e-06	7.27572	4.24939	1.57252	FGL2	UP
16696237	0.000922	6.25e-06	7.27471	4.24794	2.00235	SELL	UP
16854615	0.000922	6.27e-06	-7.27252	4.24479	-1.06966	CCDC178	DOWN
16797371	0.000922	6.28e-06	7.27195	4.24397	3.45978	IGHA1	UP
16795943	0.000947	6.51e-06	7.24671	4.20765	1.88217	TC2N	UP
16811085	0.000948	6.54e-06	7.24349	4.20301	1.52277	ITGA11	UP
16826738	0.000948	6.56e-06	7.24174	4.20049	3.41167	MT1G	UP
17022929	0.000949	6.59e-06	7.23886	4.19634	1.67385	COL10A1	UP
16817824	0.000949	6.6e-06	7.23743	4.19427	1.85649	CORO1A	UP
17013174	0.000965	6.78e-06	-7.21892	4.16756	-1.1233	AIG1	DOWN
16753270	0.000965	6.78e-06	7.21889	4.16752	1.0942	SLC16A7	UP
16813189	0.000965	6.79e-06	-7.2187	4.16724	-1.25973	PEX11A	DOWN
16761269	0.000968	6.86e-06	7.21108	4.15623	2.18392	CLEC7A	UP
16753914	0.00097	6.91e-06	7.20666	4.14983	1.91217	LYZ	UP
16817537	0.00097	6.93e-06	7.20484	4.1472	1.53336	LAT	UP
17055786	0.000985	7.06e-06	7.19218	4.12888	2.80728	LOC541472	UP
16801473	0.001	7.21e-06	7.1776	4.10774	3.69643	AQP9	UP
17111520	0.00103	7.42e-06	7.15765	4.07876	2.55554	ALAS2	UP
17035371	0.00105	7.63e-06	7.13886	4.05144	1.40853	HCP5	UP
16791319	0.00105	7.67e-06	7.13497	4.04577	1.11112	ADCY4	UP
16988703	0.00105	7.69e-06	7.13371	4.04393	1.02729	LMNB1	UP
16802903	0.00108	7.98e-06	-7.10849	4.00714	-1.05393	LOXL1	DOWN
16911632	0.00108	8.03e-06	-7.10413	4.00077	-1.25855	PCSK2	DOWN
16904324	0.0011	8.24e-06	7.0866	3.97515	1.59296	FAP	UP
16960355	0.0011	8.25e-06	7.08641	3.97487	1.22617	TM4SF1	UP
17068837	0.00111	8.34e-06	-7.07862	3.96346	-1.33981	LOC101929217	DOWN
17083776	0.00111	8.39e-06	-7.07456	3.9575	-2.0899	SH3GL2	DOWN
16904488	0.00114	8.68e-06	-7.05161	3.92384	-2.45987	SLC38A11	DOWN
17111895	0.00114	8.69e-06	7.05109	3.92308	2.54365	IL2RG	UP
17111555	0.00119	9.1e-06	-7.01975	3.87698	-1.16925	USP51	DOWN
17122716	0.00121	9.33e-06	-7.00296	3.85223	-1.07657	OSER1-DT	DOWN
16691090	0.00121	9.38e-06	6.99969	3.84739	1.93757	PTPN22	UP
16863589	0.00121	9.39e-06	6.99914	3.84659	2.25001	C5AR1	UP
17123028	0.00121	9.51e-06	6.99058	3.83395	1.25238	VWF	UP
16869666	0.00122	9.62e-06	6.98294	3.82264	1.96663	ADGRE3	UP
17016383	0.00122	9.66e-06	-6.9797	3.81786	-2.08346	HIST1H4D	DOWN
17122724	0.00126	9.96e-06	-6.95938	3.78778	-1.11534	OSER1-DT	DOWN
16696217	0.00127	1.01e-05	6.95173	3.77644	1.35612	SELP	UP
16660360	0.00127	1.02e-05	6.94533	3.76694	1.10868	CDA	UP
17122722	0.00128	1.02e-05	-6.94175	3.76163	-1.1018	OSER1-DT	DOWN
17059828	0.00128	1.03e-05	6.94005	3.75911	2.0321	TFPI2	UP
16861997	0.00132	1.06e-05	6.9164	3.72395	1.64996	ZFP36	UP
17095870	0.00132	1.08e-05	-6.90761	3.71085	-1.3559	OGN	DOWN
16867344	0.00133	1.09e-05	6.90085	3.70079	1.33419	LRG1	UP
16698185	0.00135	1.1e-05	6.89235	3.68812	1.88212	CHI3L1	UP
16747896	0.00137	1.13e-05	6.878	3.6667	1.16833	CLEC4A	UP
17121792	0.00137	1.13e-05	6.8766	3.6646	2.24512	LOC105376839	UP
17037303	0.00137	1.14e-05	6.87053	3.65554	1.27039	HLA-DMA	UP
17029721	0.00137	1.14e-05	6.86691	3.65011	1.69795	HLA-DQB1	UP
17039923	0.00137	1.14e-05	6.86691	3.65011	1.69795	HLA-DQB1	UP
17034749	0.00137	1.15e-05	6.8663	3.64921	1.15625	HLA-DQB2	UP
17039935	0.00137	1.15e-05	6.8663	3.64921	1.15625	HLA-DQB2	UP
16754358	0.0014	1.19e-05	-6.8435	3.61507	-1.33707	GLIPR1L2	DOWN
16903140	0.0014	1.19e-05	6.84162	3.61226	2.14379	CXCR4	UP
17032423	0.00141	1.2e-05	6.83513	3.60252	1.20766	HLA-DQB2	UP
17037218	0.00141	1.2e-05	6.83513	3.60252	1.20766	HLA-DQB2	UP
16773662	0.00141	1.21e-05	6.83042	3.59545	1.70585	ALOX5AP	UP
17054325	0.00142	1.22e-05	6.82599	3.58881	1.48857	GPR146	UP
17122492	0.00147	1.28e-05	6.79532	3.54269	1.05108	MIR4435-2HG	UP
16662329	0.00148	1.29e-05	6.78614	3.52887	1.38312	GJA4	UP
16672838	0.00148	1.3e-05	6.7849	3.52699	1.47033	FCER1G	UP
17071298	0.00149	1.31e-05	-6.77855	3.51741	-1.25834	OSR2	DOWN
16917859	0.00149	1.32e-05	6.77306	3.50914	1.2838	CD93	UP
16697095	0.0015	1.34e-05	6.76357	3.49481	2.13791	NCF2	UP
16742384	0.00151	1.35e-05	6.75885	3.48768	1.36483	LRRC32	UP
16731461	0.00153	1.37e-05	6.74651	3.46902	1.67065	NNMT	UP
17122488	0.00155	1.4e-05	6.73455	3.45092	1.23874	MIR4435-2HG	UP
17018011	0.00155	1.41e-05	6.73095	3.44547	1.15488	HLA-DMA	UP
16746906	0.0016	1.46e-05	6.70785	3.41042	1.00249	TEAD4	UP
17080991	0.00161	1.48e-05	6.6997	3.39804	1.48978	LINC00861	UP
16903771	0.00162	1.5e-05	-6.69115	3.38503	-1.10411	CACNB4	DOWN
17083433	0.00163	1.51e-05	6.6867	3.37827	1.13498	IL33	UP
16815828	0.00163	1.51e-05	6.68447	3.37487	1.93711	CIITA	UP
17122940	0.00163	1.51e-05	-6.68334	3.37316	-1.29109	CECR7	DOWN
16998411	0.00163	1.52e-05	-6.68232	3.3716	-1.65571	LIX1	DOWN
16861516	0.00163	1.52e-05	-6.68196	3.37106	-1.11871	LINC01535	DOWN
16910728	0.00163	1.52e-05	6.67874	3.36616	1.59095	SIRPA	UP
16819478	0.00169	1.59e-05	6.64994	3.32222	1.21284	CCL22	UP
16856906	0.00169	1.59e-05	6.64984	3.32208	1.61093	S1PR4	UP
16754269	0.00169	1.6e-05	-6.64802	3.31929	-1.39208	TRHDE	DOWN
16968680	0.0017	1.61e-05	6.64376	3.31279	1.84424	SPP1	UP
16830957	0.0017	1.61e-05	6.64203	3.31015	1.10525	ARHGEF15	UP
16675578	0.00172	1.64e-05	6.63113	3.29348	2.4285	PTPRC	UP
16703642	0.00173	1.66e-05	6.62521	3.28442	1.05986	MAP3K8	UP
16883624	0.00175	1.69e-05	6.61105	3.26273	1.17058	IL1R2	UP
16677278	0.00178	1.74e-05	6.59435	3.23711	1.23028	ATF3	UP
16844381	0.0018	1.77e-05	6.58247	3.21886	1.77077	CCR7	UP
16912472	0.0018	1.79e-05	6.57295	3.20422	2.0966	HCK	UP
16977502	0.00182	1.82e-05	6.5643	3.1909	1.56067	PLAC8	UP
17122718	0.00183	1.84e-05	-6.5552	3.17689	-1.06292	OSER1-DT	DOWN
16723614	0.00183	1.85e-05	6.5528	3.1732	1.36938	CD44	UP
16858137	0.00183	1.86e-05	6.55031	3.16935	1.64351	ICAM1	UP
17023736	0.00183	1.86e-05	6.54993	3.16877	1.78433	VNN2	UP
16695535	0.00183	1.86e-05	6.5485	3.16655	1.40073	ARHGAP30	UP
17026762	0.00183	1.88e-05	6.54429	3.16007	1.74448	LTB	UP
17029082	0.00183	1.88e-05	6.54429	3.16007	1.74448	LTB	UP
17031867	0.00183	1.88e-05	6.54429	3.16007	1.74448	LTB	UP
17034339	0.00183	1.88e-05	6.54429	3.16007	1.74448	LTB	UP
17036587	0.00183	1.88e-05	6.54429	3.16007	1.74448	LTB	UP
17039380	0.00183	1.88e-05	6.54429	3.16007	1.74448	LTB	UP
17041863	0.00183	1.88e-05	6.54429	3.16007	1.74448	LTB	UP
16709268	0.00183	1.88e-05	6.54221	3.15687	1.47288	ACSL5	UP
16875478	0.00185	1.91e-05	6.53341	3.14327	1.22743	LAIR1	UP
16939768	0.00187	1.94e-05	-6.5226	3.12658	-1.22709	KRBOX1	DOWN
16978896	0.00191	1.98e-05	-6.50819	3.10429	-1.10771	COL25A1	DOWN
16834931	0.00191	2.01e-05	6.5008	3.09284	1.32084	FMNL1	UP
17020258	0.00191	2.01e-05	-6.50011	3.09176	-1.43093	BMP5	DOWN
17034810	0.00192	2.04e-05	6.49061	3.07705	1.46728	HLA-DMB	UP
17039996	0.00192	2.04e-05	6.49061	3.07705	1.46728	HLA-DMB	UP
17092482	0.00193	2.06e-05	-6.48543	3.06902	-1.15042	MPDZ	DOWN
16712168	0.00195	2.08e-05	-6.47936	3.05959	-1.01272	CUBN	DOWN
16709959	0.00196	2.1e-05	6.47148	3.04736	1.50755	LOC105378516	UP
16916492	0.002	2.17e-05	6.45018	3.01424	1.26582	SIRPB1	UP
16873060	0.00201	2.19e-05	6.44661	3.00868	2.15588	PLAUR	UP
16738400	0.00201	2.21e-05	6.43905	2.9969	1.2238	APLNR	UP
16912130	0.00203	2.25e-05	6.4271	2.97827	1.83252	CST7	UP
16865398	0.00203	2.26e-05	6.42539	2.9756	1.26979	LILRB1	UP
16768149	0.00203	2.26e-05	6.425	2.97499	1.04261	RASSF9	UP
16934749	0.00204	2.27e-05	6.42268	2.97137	1.5742	RAC2	UP
16928399	0.00204	2.28e-05	-6.41986	2.96697	-1.10587	CRYBB2	DOWN
16760257	0.00205	2.29e-05	6.41612	2.96114	1.32902	VWF	UP
17103396	0.00205	2.29e-05	6.41537	2.95996	2.0004	WAS	UP
16971631	0.00205	2.3e-05	6.41475	2.95898	1.74236	TLR2	UP
16966582	0.00208	2.34e-05	-6.40235	2.93962	-1.60926	SLC10A4	DOWN
17084545	0.00216	2.46e-05	-6.37236	2.89265	-1.2358	LOC730098	DOWN
16719217	0.00217	2.47e-05	6.36756	2.88512	1.46257	CHST15	UP
16698038	0.00217	2.48e-05	-6.36666	2.88372	-1.15704	SYT2	DOWN
16933760	0.00217	2.48e-05	6.36492	2.88098	1.16363	LIF	UP
16812344	0.00218	2.5e-05	6.36126	2.87523	3.25942	BCL2A1	UP
17114567	0.00221	2.54e-05	-6.35102	2.85915	-1.00094	SNORD61	DOWN
16978976	0.00221	2.55e-05	6.34853	2.85524	1.38098	CFI	UP
16798132	0.00221	2.56e-05	-6.34654	2.85211	-1.35075	SNORD116-1	DOWN
17020069	0.00223	2.59e-05	-6.33951	2.84106	-1.47215	GSTA1	DOWN
16813029	0.00224	2.59e-05	6.33761	2.83807	1.24396	HAPLN3	UP
16703407	0.00228	2.67e-05	6.31972	2.8099	2.02991	APBB1IP	UP
17029807	0.00229	2.68e-05	6.31694	2.80552	1.3887	HLA-DMB	UP
16798164	0.0023	2.72e-05	-6.3078	2.7911	-1.52008	SNORD116-14	DOWN
16854540	0.00232	2.76e-05	-6.29748	2.77481	-1.75737	B4GALT6	DOWN
16672323	0.00234	2.82e-05	6.28598	2.75665	1.2312	CD1C	UP
16744967	0.00235	2.83e-05	6.28255	2.75122	1.49214	JAML	UP
17053371	0.00237	2.86e-05	6.27634	2.74139	1.11282	GIMAP8	UP
16672654	0.00238	2.88e-05	6.27235	2.73509	2.57466	SLAMF7	UP
16779472	0.0024	2.91e-05	-6.26596	2.72496	-1.22067	CNMD	DOWN
16910068	0.00242	2.95e-05	6.25737	2.71136	1.31646	MIR4440	UP
16997143	0.00243	2.96e-05	-6.25451	2.70682	-1.31358	LOC105379031	DOWN
16856803	0.00243	2.98e-05	6.24948	2.69884	1.577	GADD45B	UP
16940260	0.00244	3e-05	6.24705	2.69499	1.0731	NBEAL2	UP
16839887	0.00248	3.05e-05	6.23567	2.67692	1.32242	ATP2A3	UP
17122474	0.00248	3.07e-05	6.23254	2.67195	1.06717	MIR4435-2HG	UP
16659605	0.00252	3.12e-05	6.22221	2.65553	1.13124	EFHD2	UP
16760868	0.00253	3.16e-05	6.2141	2.64263	1.59463	SLC2A3	UP
17046911	0.00254	3.18e-05	6.20913	2.63472	2.17759	NCF1B	UP
16956316	0.00255	3.19e-05	-6.20754	2.63219	-1.66048	CNTN3	DOWN
16995866	0.00256	3.21e-05	6.20372	2.6261	1.52959	FLJ32255	UP
16964000	0.00256	3.23e-05	6.20011	2.62035	1.10325	TACC3	UP
17074259	0.00257	3.25e-05	6.19514	2.61243	1.0108	ANGPT2	UP
16798190	0.00257	3.26e-05	-6.19407	2.61071	-1.01239	SNORD116-15	DOWN
16666738	0.0026	3.31e-05	6.18527	2.59668	2.05577	CYR61	UP
17042506	0.00262	3.35e-05	6.17647	2.58262	1.5989	HLA-DMB	UP
17049904	0.00262	3.35e-05	-6.17615	2.58212	-1.28643	LRRC17	DOWN
17122850	0.00263	3.39e-05	6.1693	2.57118	1.56292	ANKRD20A5P	UP
16991296	0.00264	3.42e-05	-6.16363	2.56211	-1.29869	GRIA1	DOWN
16929562	0.00264	3.43e-05	6.16226	2.55991	1.10104	HMOX1	UP
17052060	0.0027	3.53e-05	-6.14358	2.53001	-1.1681	CHRM2	DOWN
16964735	0.0027	3.54e-05	6.14288	2.5289	1.17196	S100P	UP
16980716	0.0027	3.55e-05	6.14165	2.52693	1.23124	TMEM154	UP
17095587	0.0027	3.56e-05	6.13954	2.52354	1.35358	SEMA4D	UP
16764732	0.0027	3.56e-05	6.13934	2.52322	1.86408	BIN2	UP
16852296	0.0027	3.58e-05	6.13591	2.51773	1.13002	LIPG	UP
17121846	0.00273	3.62e-05	6.12845	2.50576	1.06456	CD300H	UP
16695490	0.00273	3.63e-05	6.12685	2.50321	1.62879	F11R	UP
17055937	0.00274	3.66e-05	6.12183	2.49513	1.36059	OSBPL3	UP
16990199	0.00275	3.68e-05	-6.11796	2.48894	-1.68372	VTRNA1-1	DOWN
16977058	0.00276	3.7e-05	6.11451	2.48339	1.41272	CXCL11	UP
16893846	0.00277	3.73e-05	6.10956	2.47543	1.1582	PXDN	UP
17069063	0.00277	3.75e-05	6.10739	2.47194	1.56479	LYN	UP
17037290	0.00278	3.76e-05	6.10551	2.46892	1.59749	HLA-DMB	UP
17033617	0.00282	3.83e-05	6.09324	2.44919	1.56397	HLA-DQA1	UP
16830621	0.00282	3.85e-05	-6.09127	2.44602	-1.39038	ATP1B2	DOWN
16826444	0.00282	3.85e-05	6.09095	2.4455	1.24136	SNX20	UP
17014208	0.00282	3.85e-05	6.09073	2.44515	1.09495	SYTL3	UP
16881138	0.00283	3.88e-05	6.08628	2.43799	1.9795	MXD1	UP
17019029	0.00284	3.9e-05	6.08227	2.43153	1.46696	TREM2	UP
16908307	0.00285	3.93e-05	6.07787	2.42443	2.18055	CXCR1	UP
16864059	0.00285	3.93e-05	6.07714	2.42325	2.09755	CD37	UP
16841907	0.00285	3.95e-05	6.07501	2.41982	1.55892	RASD1	UP
16765542	0.00286	3.96e-05	6.07275	2.41618	1.32554	ZNF385A	UP
16833965	0.00286	3.98e-05	-6.07071	2.41289	-1.31845	THRA	DOWN
17031153	0.00288	4.01e-05	6.06513	2.40388	1.67275	HLA-DQA1	UP
16914823	0.00288	4.03e-05	6.06302	2.40048	1.99011	SMIM25	UP
17017998	0.00289	4.04e-05	6.06048	2.39639	1.59225	HLA-DMB	UP
16765537	0.00293	4.15e-05	6.04457	2.37068	2.22468	GPR84	UP
16798212	0.00294	4.16e-05	-6.04338	2.36875	-1.53641	SNORD116-23	DOWN
16937645	0.00295	4.2e-05	-6.03718	2.35872	-1.23754	SLC6A1	DOWN
16752061	0.00295	4.21e-05	6.03592	2.35669	1.79297	NCKAP1L	UP
17117874	0.00295	4.21e-05	6.03587	2.35661	1.99557	LOC101928152	UP
16843162	0.00295	4.21e-05	6.03568	2.3563	1.70806	EVI2B	UP
17041240	0.00299	4.26e-05	6.02761	2.34323	2.07184	HLA-DQA1	UP
17105332	0.00299	4.28e-05	6.02487	2.3388	1.10523	SRPX2	UP
16787268	0.00299	4.28e-05	-6.02473	2.33857	-1.32017	LOC105370614	DOWN
16935607	0.003	4.3e-05	6.02178	2.3338	1.62508	NFAM1	UP
17121102	0.00301	4.33e-05	6.01798	2.32764	2.04574	LINC00639	UP
16712277	0.00302	4.35e-05	6.01485	2.32256	1.00611	ST8SIA6	UP
16952868	0.00303	4.37e-05	6.01238	2.31856	1.24121	XCR1	UP
17056740	0.00308	4.46e-05	6.00025	2.29888	1.19631	ELMO1	UP
16792211	0.00313	4.55e-05	5.98732	2.27788	1.03041	CLEC14A	UP
16944618	0.0032	4.7e-05	5.96762	2.24583	1.77141	CD86	UP
17077023	0.00324	4.79e-05	-5.95669	2.22802	-1.45354	PXDNL	DOWN
16736337	0.00326	4.83e-05	-5.95084	2.21849	-1.04585	USH1C	DOWN
17006142	0.00329	4.9e-05	5.94279	2.20536	1.11595	HLA-A	UP
17082982	0.00329	4.91e-05	5.94065	2.20187	1.7024	DOCK8	UP
17017926	0.00329	4.91e-05	5.94037	2.20141	1.2618	HLA-DQB2	UP
16866394	0.0033	4.95e-05	-5.93646	2.19504	-1.15363	PLPP2	DOWN
16836021	0.00331	4.96e-05	5.93478	2.19229	1.1402	ABCC3	UP
16673682	0.00332	4.99e-05	5.93125	2.18653	1.04102	FMO3	UP
17011302	0.00333	5.02e-05	5.92709	2.17972	1.29745	CRYBG1	UP
17083569	0.00335	5.07e-05	-5.92153	2.17064	-1.57461	PTPRD-AS1	DOWN
17053535	0.00335	5.07e-05	-5.92129	2.17025	-1.10944	ASIC3	DOWN
17012036	0.00335	5.07e-05	5.92109	2.16991	1.88839	VGLL2	UP
17101537	0.00338	5.11e-05	5.91631	2.1621	1.82635	TLR8	UP
16867733	0.0034	5.16e-05	5.9102	2.1521	1.81171	DENND1C	UP
16875262	0.00344	5.22e-05	5.90307	2.14043	1.18656	OSCAR	UP
16798951	0.00347	5.28e-05	5.8965	2.12967	1.09519	GREM1	UP
16769770	0.00351	5.36e-05	5.88775	2.11532	1.4914	SELPLG	UP
16670367	0.00352	5.38e-05	5.88509	2.11097	2.02922	FCGR1A	UP
16840321	0.00358	5.49e-05	5.87238	2.0901	1.29077	NLRP1	UP
16695121	0.00359	5.52e-05	5.86949	2.08535	1.59465	AIM2	UP
16661497	0.00361	5.56e-05	5.86561	2.07898	1.78998	THEMIS2	UP
16668582	0.00362	5.58e-05	5.86267	2.07415	2.02277	CD53	UP
16771417	0.00365	5.63e-05	5.85763	2.06587	1.0209	OASL	UP
16994743	0.00367	5.67e-05	-5.85356	2.05917	-1.09754	CDH12	DOWN
16961616	0.00367	5.68e-05	5.8522	2.05694	1.11285	TNFSF10	UP
17122082	0.00369	5.74e-05	-5.84587	2.04652	-1.63336	LOC105376917	DOWN
16741969	0.00371	5.79e-05	5.84092	2.03837	1.62619	UCP2	UP
16706180	0.00371	5.8e-05	5.83974	2.03642	2.1291	PLAU	UP
16817328	0.00373	5.84e-05	5.8353	2.02912	1.63538	APOBR	UP
16981490	0.00373	5.85e-05	-5.83461	2.02797	-1.04411	LOC101930370	DOWN
16745002	0.00374	5.87e-05	5.83206	2.02377	1.19001	MPZL2	UP
17070061	0.00375	5.9e-05	5.8294	2.01939	1.53732	LY96	UP
17122496	0.00375	5.9e-05	5.82927	2.01917	1.06698	MIR4435-2HG	UP
16796262	0.00376	5.92e-05	5.82733	2.01598	1.2506	SERPINA1	UP
16900104	0.00377	5.94e-05	5.82554	2.01302	3.67619	IGKC	UP
17019728	0.00377	5.97e-05	5.82226	2.00762	3.59919	PLA2G7	UP
17042433	0.00377	5.98e-05	5.82112	2.00573	1.12262	HLA-DQB2	UP
17053384	0.00377	6e-05	5.81875	2.00183	1.00209	GIMAP4	UP
16755014	0.00379	6.04e-05	-5.81455	1.99489	-1.16946	LOC105369897	DOWN
16977045	0.00381	6.13e-05	5.80648	1.98156	1.82779	CXCL9	UP
16698697	0.00383	6.16e-05	5.8028	1.97549	1.78425	FCMR	UP
16693844	0.00386	6.28e-05	5.79198	1.95759	1.06596	KCNN3	UP
16821330	0.00386	6.29e-05	5.79033	1.95487	1.71443	PLCG2	UP
16927810	0.0039	6.37e-05	5.78334	1.9433	3.55015	IGKV@	UP
16720771	0.0039	6.38e-05	5.78228	1.94155	1.10839	LSP1	UP
17093463	0.00393	6.43e-05	-5.77734	1.93337	-1.14786	CNTFR	DOWN
16870394	0.00402	6.62e-05	5.76	1.90463	1.56383	LRRC25	UP
16692834	0.00404	6.68e-05	5.75429	1.89516	1.98348	CTSS	UP
16899982	0.00405	6.72e-05	5.75034	1.8886	2.52274	LINC01943	UP
16860971	0.00406	6.74e-05	5.74885	1.88612	1.76659	HAMP	UP
17094743	0.00407	6.78e-05	-5.74509	1.87988	-1.0112	MAMDC2-AS1	DOWN
16747623	0.00408	6.83e-05	5.74077	1.87271	1.58978	PTPN6	UP
17051626	0.00414	6.95e-05	-5.73025	1.85522	-1.27944	MEST	DOWN
16865540	0.00415	6.99e-05	5.72713	1.85002	1.49347	FCAR	UP
16797607	0.00416	7.01e-05	5.72491	1.84634	2.33932	IGHA1	UP
17121100	0.00417	7.04e-05	5.72311	1.84334	1.92848	LINC00639	UP
16797358	0.00417	7.04e-05	5.72266	1.84259	1.17946	IGHG2	UP
16985033	0.00418	7.08e-05	5.71925	1.83691	1.5749	GAPT	UP
16927869	0.0042	7.13e-05	5.71493	1.82972	3.13229	IGLC1	UP
16870667	0.00422	7.18e-05	5.71101	1.82319	1.19851	GMIP	UP
16874846	0.00423	7.23e-05	5.70669	1.816	1.88218	SIGLEC10	UP
16689400	0.00423	7.26e-05	5.70446	1.81229	2.52309	GBP5	UP
16865028	0.00424	7.28e-05	5.70275	1.80942	1.58064	MIR520F	UP
17020846	0.00425	7.33e-05	5.69841	1.80219	2.38077	COL12A1	UP
16797440	0.00425	7.4e-05	5.69288	1.79296	3.63633	IGHG1	UP
16843511	0.00425	7.46e-05	5.68822	1.7852	1.29464	CCL5	UP
17119424	0.00426	7.47e-05	-5.68708	1.78329	-1.23492	SNORD138	DOWN
16900166	0.0043	7.55e-05	5.68049	1.77228	3.31359	IGKC	UP
16852179	0.00435	7.7e-05	5.66946	1.75385	1.30314	SLC14A1	UP
16992122	0.00448	8.06e-05	5.64197	1.70783	1.69296	DOCK2	UP
16748227	0.00448	8.07e-05	5.641	1.70621	1.6138	KLRF1	UP
16882555	0.00451	8.14e-05	5.63582	1.69752	2.76144	IGK	UP
17006911	0.00453	8.19e-05	5.63222	1.69148	1.22593	C2	UP
16760825	0.00456	8.25e-05	5.62789	1.68422	1.4313	CLEC4C	UP
16749423	0.00462	8.4e-05	5.61713	1.66616	1.16476	ARNTL2	UP
16882332	0.00466	8.48e-05	5.61153	1.65676	1.09583	GNLY	UP
16704375	0.00468	8.58e-05	5.60478	1.64541	1.52382	ALOX5	UP
16669278	0.00468	8.58e-05	5.60439	1.64475	1.60358	FAM46C	UP
16971272	0.00468	8.6e-05	5.60325	1.64284	1.00424	EDNRA	UP
16882277	0.00468	8.61e-05	5.60271	1.64192	1.25506	VAMP8	UP
16891843	0.00468	8.61e-05	5.60259	1.64173	2.00082	SP140	UP
16828588	0.00472	8.69e-05	-5.59714	1.63257	-1.35382	MAFTRR	DOWN
16882723	0.00472	8.74e-05	5.59365	1.62668	3.01538	IGKC	UP
16952874	0.00473	8.75e-05	5.59289	1.62541	1.65035	CCR1	UP
16967853	0.00473	8.76e-05	5.59211	1.6241	1.67523	AREG	UP
16882720	0.00487	9.06e-05	5.57213	1.59043	2.3461	IGKC	UP
16665182	0.0049	9.2e-05	-5.56343	1.57576	-1.10409	PRKAA2	DOWN
16773681	0.0049	9.21e-05	5.56257	1.57432	1.05511	MEDAG	UP
16858496	0.00492	9.26e-05	5.55967	1.56942	1.0482	CNN1	UP
17009794	0.00492	9.27e-05	-5.55875	1.56786	-1.06061	BEND6	DOWN
16872803	0.005	9.47e-05	5.54625	1.54676	1.23941	CEACAM1	UP
16880942	0.00502	9.53e-05	5.54268	1.54072	2.71232	PLEK	UP
16917004	0.00502	9.53e-05	5.54258	1.54056	1.32359	GPCPD1	UP
17081373	0.00506	9.62e-05	5.53682	1.53082	1.07853	SLA	UP
17089819	0.00508	9.72e-05	5.53093	1.52085	1.00815	PKN3	UP
17076984	0.00515	9.9e-05	-5.52015	1.50261	-1.25549	EFCAB1	DOWN
17122648	0.00515	9.91e-05	5.51932	1.5012	1.09287	MIR4435-2HG	UP
16936851	0.00518	9.99e-05	-5.5148	1.49355	-1.2726	CNTN4	DOWN
17002681	0.00518	9.99e-05	5.51448	1.493	1.82309	LCP2	UP
16922759	0.00521	0.000101	5.50843	1.48275	1.54636	KCNJ15	UP
17023707	0.00523	0.000102	5.50265	1.47295	1.52796	VNN1	UP
16950825	0.00523	0.000102	5.50239	1.47251	1.19008	TIMP4	UP
16781591	0.00523	0.000102	5.50236	1.47245	1.21725	RNASE6	UP
16738694	0.00523	0.000102	5.50179	1.47149	1.46092	MPEG1	UP
16807342	0.00523	0.000102	5.50176	1.47143	1.51168	PLCB2	UP
16776339	0.00528	0.000103	5.4945	1.45912	1.39337	TNFSF13B	UP
16976599	0.00531	0.000104	5.48876	1.44937	1.1554	SULT1B1	UP
17125002	0.00533	0.000105	-5.48608	1.44482	-1.32443	LOC100996662	DOWN
16969229	0.00534	0.000105	5.48451	1.44215	1.97252	DAPP1	UP
16713562	0.00534	0.000105	5.48282	1.43929	1.23672	DEPP1	UP
16726255	0.00535	0.000106	5.48155	1.43713	1.45533	FERMT3	UP
17086060	0.00536	0.000106	-5.47958	1.43378	-1.19039	LOC105376093	DOWN
16882710	0.00536	0.000106	5.47869	1.43227	3.37419	IGKC	UP
16735375	0.00536	0.000106	-5.47852	1.43198	-1.05126	STK33	DOWN
16860137	0.00536	0.000106	5.47734	1.42998	1.02761	LOC105372319	UP
17060376	0.00537	0.000107	5.47634	1.42828	1.18068	GJC3	UP
16735214	0.00543	0.000108	5.46898	1.41577	1.12286	GVINP1	UP
16967788	0.00544	0.000108	5.46743	1.41312	2.00737	PF4V1	UP
16810978	0.00549	0.00011	-5.45937	1.39942	-1.43196	LCTL	DOWN
16990203	0.0055	0.00011	-5.45741	1.39606	-1.19961	VTRNA1-3	DOWN
16995601	0.00556	0.000112	5.44795	1.37997	2.04926	FYB1	UP
16881353	0.0056	0.000113	5.44053	1.36731	1.17211	DYSF	UP
17075789	0.00571	0.000116	5.42581	1.34221	1.22531	SCARA5	UP
17048380	0.00573	0.000117	-5.42227	1.33615	-1.30826	RBM48	DOWN
16739733	0.00573	0.000117	-5.4217	1.33519	-1.27667	HRASLS5	DOWN
17096471	0.00574	0.000117	5.42035	1.33288	1.20694	TBC1D2	UP
16922424	0.00582	0.000119	-5.40982	1.3149	-1.08915	KCNE2	DOWN
16886174	0.00585	0.000121	5.4037	1.30443	2.33298	KYNU	UP
17084130	0.00588	0.000122	5.39903	1.29643	1.07844	TEK	UP
17010529	0.00588	0.000122	-5.39722	1.29334	-1.08717	HMGN3-AS1	DOWN
17037192	0.00591	0.000123	5.39155	1.28364	1.39503	HLA-DRB4	UP
17109893	0.00593	0.000124	5.3894	1.27996	1.70788	CXorf21	UP
17057381	0.00594	0.000124	5.38761	1.27689	1.75145	MYO1G	UP
17057718	0.00594	0.000125	-5.38511	1.27261	-1.07772	FIGNL1	DOWN
16761843	0.00594	0.000125	5.38413	1.27094	1.06966	ARHGDIB	UP
16929662	0.00596	0.000125	5.38167	1.26672	1.62526	NCF4	UP
17023255	0.00604	0.000127	-5.37171	1.24964	-2.01682	TRDN	DOWN
16882726	0.00606	0.000128	5.3686	1.24431	2.87466	IGKC	UP
16868187	0.00607	0.000129	5.36654	1.24078	1.37949	MYO1F	UP
17059355	0.00609	0.000129	-5.36341	1.23541	-1.27759	SEMA3D	DOWN
17053804	0.0061	0.00013	-5.36069	1.23074	-1.16916	DPP6	DOWN
17002396	0.00621	0.000133	-5.34795	1.20887	-1.12401	ZBED8	DOWN
16886491	0.00622	0.000133	5.34599	1.2055	2.35244	TNFAIP6	UP
17012946	0.00625	0.000134	5.34218	1.19895	1.97107	TNFAIP3	UP
17115850	0.00635	0.000137	5.33064	1.17912	1.55634	CSF2RA	UP
17007266	0.00637	0.000138	5.32711	1.17304	1.57625	HLA-DQA1	UP
16919547	0.00642	0.000139	5.32192	1.1641	1.72332	SLPI	UP
16865341	0.00653	0.000142	5.31032	1.14412	1.38668	LAIR2	UP
16990848	0.00654	0.000142	5.30881	1.14153	1.07034	ADRB2	UP
16872705	0.00656	0.000143	5.30545	1.13573	1.13309	POU2F2	UP
16882770	0.00663	0.000145	5.29681	1.12084	2.90327	IGKC	UP
16875414	0.00666	0.000146	5.29239	1.1132	1.43653	LILRB2	UP
16803894	0.00667	0.000147	-5.2892	1.1077	-1.0448	SAXO2	DOWN
16781995	0.00674	0.00015	-5.27864	1.08947	-1.23654	TRDV3	DOWN
16675301	0.00676	0.00015	5.27589	1.0847	2.53267	RGS1	UP
16826510	0.00676	0.000151	-5.27472	1.08269	-1.12334	TOX3	DOWN
16965432	0.00677	0.000151	-5.2728	1.07937	-1.6399	MIR218-1	DOWN
16863115	0.00684	0.000153	5.26394	1.06405	1.49154	APOE	UP
17059567	0.00687	0.000155	5.25976	1.05682	1.00825	STEAP4	UP
16705283	0.00688	0.000156	-5.25602	1.05035	-1.25411	LINC01515	DOWN
17078539	0.00693	0.000157	-5.25045	1.0407	-1.03062	ZNF704	DOWN
17051474	0.00699	0.000159	-5.2449	1.03109	-1.12124	SMKR1	DOWN
16669169	0.00701	0.00016	5.24147	1.02514	2.12465	CD2	UP
16900128	0.00706	0.000161	5.23584	1.0154	3.19656	IGKV3D-15	UP
16984244	0.00709	0.000163	5.23046	1.00606	1.10385	OSMR	UP
16871846	0.00709	0.000163	-5.22932	1.00409	-1.01726	ZNF607	DOWN
16968488	0.00717	0.000165	-5.22093	0.98953	-1.10469	WDFY3-AS2	DOWN
16941560	0.00728	0.000168	5.21097	0.97224	1.09436	STAB1	UP
16720331	0.00728	0.000168	-5.21047	0.97137	-1.04158	LOC171391	DOWN
16705188	0.00734	0.00017	-5.2051	0.96204	-1.69708	CABCOCO1	DOWN
17016363	0.00739	0.000172	5.19956	0.9524	1.06915	HIST1H3B	UP
17088139	0.00757	0.000178	-5.17866	0.91604	-1.20961	KIAA1958	DOWN
16906571	0.00758	0.000179	5.17664	0.91252	1.28844	STAT4	UP
17117730	0.00779	0.000184	5.15913	0.882	1.09056	DND1	UP
16743912	0.0078	0.000185	5.15656	0.87752	1.29127	CARD16	UP
17027091	0.0078	0.000185	5.15613	0.87677	1.07514	HLA-DQB2	UP
17029735	0.0078	0.000185	5.15613	0.87677	1.07514	HLA-DQB2	UP
16861030	0.00784	0.000187	5.15179	0.86919	2.44684	FFAR2	UP
16848405	0.00785	0.000187	-5.15033	0.86666	-1.05701	SOX9-AS1	DOWN
16938647	0.00792	0.00019	5.14119	0.85069	1.54095	CMTM8	UP
16704269	0.00792	0.00019	5.1405	0.84949	1.04943	LINC00840	UP
16829835	0.00793	0.000191	5.13957	0.84786	1.16502	ARRB2	UP
16715228	0.00795	0.000191	5.13751	0.84427	1.03348	VSIR	UP
16793692	0.00806	0.000194	-5.1283	0.82816	-1.01596	KCNH5	DOWN
16862427	0.00809	0.000195	5.12603	0.82419	1.0645	CYP2S1	UP
16984287	0.00815	0.000197	5.11995	0.81357	1.19597	PTGER4	UP
17049312	0.00827	0.000201	5.10911	0.79459	1.78201	PILRA	UP
17122494	0.00828	0.000201	5.10814	0.79291	1.2919	MIR4435-2HG	UP
16938707	0.00828	0.000202	5.10714	0.79115	1.5358	CCR4	UP
16787902	0.00833	0.000203	5.10332	0.78445	1.02143	SERPINA3	UP
16850328	0.00834	0.000204	5.10127	0.78086	1.0605	MAPK8IP1P2	UP
16850334	0.00834	0.000204	5.10127	0.78086	1.0605	MAPK8IP1P2	UP
16850360	0.00834	0.000204	5.10127	0.78086	1.0605	MAPK8IP1P2	UP
17050134	0.00843	0.000206	5.09391	0.76797	1.32671	PIK3CG	UP
16732584	0.00849	0.000208	5.08926	0.75982	1.32065	SORL1	UP
17044442	0.00856	0.000211	5.08117	0.74562	1.20392	SNX10	UP
17096958	0.00868	0.000215	-5.0709	0.7276	-1.40077	FRRS1L	DOWN
16923838	0.00877	0.00022	-5.05646	0.70222	-1.02318	LOC101928796	DOWN
16734313	0.00888	0.000224	5.04684	0.68531	1.1368	CTSD	UP
16897450	0.00892	0.000226	-5.04105	0.67512	-1.0858	NRXN1	DOWN
16797512	0.00893	0.000227	5.03994	0.67317	4.20957	IGHV4-31	UP
17029705	0.00897	0.000228	5.036	0.66624	1.39387	HLA-DRB3	UP
16824907	0.00904	0.000231	5.02881	0.65358	1.90709	IGSF6	UP
16868481	0.0091	0.000233	-5.02471	0.64636	-1.24121	OLFM2	DOWN
16771797	0.00912	0.000234	5.02149	0.64068	3.26048	HCAR2	UP
16667752	0.00912	0.000234	5.02129	0.64033	1.10191	LOC101928334	UP
16814115	0.00921	0.000238	5.0132	0.62605	1.7082	HBM	UP
16765476	0.00922	0.000238	5.0123	0.62447	1.6366	LOC100240735	UP
16964200	0.00924	0.000239	5.01023	0.62082	1.0429	SH3BP2	UP
17010354	0.0093	0.000242	5.00403	0.60988	1.01611	CD109	UP
17087768	0.00933	0.000243	-5.00174	0.60584	-1.22642	NIPSNAP3B	DOWN
16774548	0.00936	0.000244	-4.99921	0.60138	-1.48222	SLC25A30-AS1	DOWN
17110670	0.00936	0.000244	4.99874	0.60054	2.43475	PIM2	UP
16874922	0.00936	0.000244	4.99842	0.59998	1.7845	SIGLEC14	UP
16968878	0.0094	0.000246	4.99512	0.59416	1.62184	MMRN1	UP
17121248	0.00955	0.000252	4.97949	0.56654	2.45881	IGHG1	UP
16874828	0.00964	0.000256	4.97252	0.55421	1.75302	NKG7	UP
17083197	0.00964	0.000256	-4.97143	0.55228	-1.62153	VLDLR	DOWN
16872248	0.00964	0.000256	4.97135	0.55213	2.61845	CLC	UP
17050350	0.00965	0.000257	-4.97031	0.55031	-1.02582	LRRN3	DOWN
16791909	0.00966	0.000257	4.96938	0.54866	1.00857	BAZ1A	UP
16949537	0.00972	0.000259	-4.96501	0.54092	-1.06817	TP63	DOWN
17056837	0.00975	0.000261	4.96105	0.5339	1.26	TARP	UP
16766539	0.00976	0.000262	4.95855	0.52949	1.15034	ARHGAP9	UP
17076273	0.00988	0.000267	-4.94887	0.51233	-1.00744	LOC728024	DOWN
17022422	0.00992	0.000269	4.94278	0.50155	1.05594	MICAL1	UP
17019048	0.00996	0.000271	4.94044	0.49739	1.60003	TREML3P	UP
16833411	0.00996	0.000272	4.93812	0.49328	2.12258	CCL18	UP
17118319	0.0101	0.000277	-4.92813	0.47556	-1.01676	TNKS	DOWN
16781610	0.0101	0.000278	4.92473	0.46953	2.11766	RNASE2	UP
16880982	0.0102	0.000282	4.91778	0.45718	1.71775	ARHGAP25	UP
16942450	0.0102	0.000282	-4.91737	0.45646	-1.04911	ADAMTS9-AS1	DOWN
16869803	0.0102	0.000283	-4.91517	0.45256	-1.01596	EPHX3	DOWN
16832568	0.0102	0.000283	-4.91469	0.4517	-1.33418	SNORD4B	DOWN
17013279	0.0103	0.000285	4.91039	0.44406	1.0573	STX11	UP
16914176	0.0103	0.000286	4.91003	0.44343	1.43657	LOC101929866	UP
17099678	0.0103	0.000286	-4.90931	0.44215	-1.00282	RNU6ATAC	DOWN
16901986	0.0104	0.000289	4.90396	0.43264	3.35605	IL1B	UP
16982083	0.0104	0.000289	4.9034	0.43163	1.36244	SLED1	UP
16967863	0.0104	0.00029	4.90172	0.42865	1.39863	AREG	UP
17031373	0.0104	0.000291	4.89989	0.4254	2.18098	UBD	UP
17016038	0.0105	0.000294	-4.89304	0.41322	-1.23566	LOC100506885	DOWN
16827546	0.0105	0.000296	4.89013	0.40804	1.37824	DPEP2	UP
16835556	0.0105	0.000296	4.89012	0.40802	1.0619	ABI3	UP
16817883	0.0106	0.000299	4.88378	0.39673	1.59202	ITGAL	UP
16812245	0.0107	0.000301	4.87955	0.3892	1.2013	CTSH	UP
16793176	0.0107	0.000304	4.87508	0.38124	1.55831	GCH1	UP
16907812	0.0108	0.000305	-4.87262	0.37685	-1.3133	ACADL	DOWN
16998675	0.0108	0.000308	-4.86709	0.367	-1.15044	LINC01950	DOWN
17001846	0.0109	0.000311	4.86186	0.35768	1.27472	CCDC69	UP
16976644	0.0109	0.000312	4.85951	0.35348	2.91103	JCHAIN	UP
16709128	0.011	0.000315	4.85433	0.34424	1.10452	DUSP5	UP
16780859	0.011	0.000316	4.8531	0.34205	1.23945	EFNB2	UP
17106877	0.0111	0.000319	4.84823	0.33336	1.86389	SASH3	UP
16672478	0.0112	0.000324	4.83971	0.31815	1.97562	SLAMF8	UP
16957795	0.0113	0.000327	4.83366	0.30734	1.13525	CD80	UP
16871119	0.0113	0.000328	-4.83213	0.30462	-1.0033	LOC400684	DOWN
16743577	0.0114	0.000333	-4.8239	0.28991	-1.03141	PGR	DOWN
16745561	0.0114	0.000333	-4.82345	0.2891	-1.16266	SNORD14E	DOWN
16745016	0.0115	0.000336	4.81871	0.28063	1.75682	CD3D	UP
17008092	0.0115	0.000338	4.81584	0.2755	1.12842	PIM1	UP
16951797	0.0116	0.00034	4.81236	0.26927	1.12462	EOMES	UP
16984010	0.0116	0.00034	4.81235	0.26925	1.27957	IL7R	UP
16819355	0.0116	0.000342	4.80957	0.26428	1.06316	NLRC5	UP
16793423	0.0116	0.000343	-4.80729	0.2602	-1.26503	ARMH4	DOWN
16684056	0.0117	0.000349	4.79818	0.24389	1.33073	FGR	UP
17025230	0.0118	0.000352	4.79254	0.23379	2.22552	TAGAP	UP
16717005	0.0119	0.000356	4.78595	0.22197	1.56118	PIK3AP1	UP
17088462	0.0119	0.000357	-4.78485	0.22	-1.02022	PAPPA	DOWN
16871444	0.0119	0.000358	4.7839	0.21829	1.388	IGFLR1	UP
16953024	0.012	0.000361	-4.77931	0.21006	-1.05515	MYL3	DOWN
16997041	0.0122	0.000371	-4.76387	0.18237	-1.20115	LOC647859	DOWN
17101775	0.0122	0.000371	-4.76295	0.18071	-1.49309	GRPR	DOWN
17018025	0.0123	0.000374	4.75956	0.17463	1.02132	HLA-DOA	UP
17037317	0.0123	0.000374	4.75956	0.17463	1.02132	HLA-DOA	UP
16909528	0.0123	0.000378	-4.75386	0.1644	-1.11751	LINC00471	DOWN
16818239	0.0124	0.00038	4.75081	0.15891	1.35034	ITGAM	UP
16703659	0.0124	0.00038	4.75042	0.15821	1.35823	MAP3K8	UP
16921656	0.0124	0.000381	-4.74919	0.156	-1.40973	LINC01549	DOWN
16782062	0.0124	0.000381	4.74826	0.15434	1.99167	YME1L1	UP
17119662	0.0126	0.000387	4.73973	0.13899	1.92957	TRBV23-1	UP
16723653	0.0126	0.00039	4.73608	0.13244	1.42522	CD44	UP
16926460	0.0127	0.000393	4.73206	0.12521	1.15151	ITGB2	UP
16839872	0.0128	0.0004	4.72116	0.10559	1.27718	P2RX1	UP
16676999	0.013	0.000407	4.71167	0.08849	1.39206	TRAF3IP3	UP
17056701	0.013	0.000409	4.70935	0.08432	1.58111	AOAH	UP
16722562	0.0132	0.000419	4.69639	0.06095	3.70109	SAA1	UP
17046041	0.0132	0.00042	4.69528	0.05895	1.57238	IKZF1	UP
17076976	0.0133	0.000423	-4.69016	0.04972	-1.09603	LOC105375823	DOWN
17029833	0.0133	0.000424	4.68942	0.04838	1.07873	HLA-DOA	UP
16986909	0.0135	0.000433	-4.67722	0.02637	-1.58692	LOC105379053	DOWN
16701975	0.0135	0.000433	-4.67719	0.02631	-1.05501	AKR1C1	DOWN
17120092	0.0135	0.000434	-4.67712	0.0262	-1.42662	LINC01359	DOWN
16711695	0.0136	0.000437	-4.67323	0.01916	-1.07049	SFTA1P	DOWN
17092531	0.0138	0.000447	-4.66021	-0.00435	-1.14956	FREM1	DOWN
17032519	0.0138	0.000447	4.65983	-0.00505	1.00711	HLA-DOA	UP
17034837	0.0138	0.000447	4.65983	-0.00505	1.00711	HLA-DOA	UP
16797368	0.0139	0.000453	4.65267	-0.01799	3.18482	IGH	UP
17048563	0.014	0.000459	-4.64552	-0.03091	-1.28119	PEG10	DOWN
16672373	0.014	0.000459	4.64504	-0.03179	1.06256	PYHIN1	UP
16782082	0.0141	0.000466	4.63707	-0.04621	1.71615	YME1L1	UP
17010539	0.0143	0.000476	-4.62581	-0.0666	-1.0079	SH3BGRL2	DOWN
17053379	0.0144	0.000483	4.61803	-0.0807	1.0785	GIMAP7	UP
16750154	0.0144	0.000483	-4.61748	-0.08169	-1.26183	CNTN1	DOWN
17044715	0.0145	0.000484	-4.61605	-0.08428	-1.25701	WIPF3	DOWN
17101279	0.0146	0.00049	-4.60939	-0.09635	-1.20659	LINC01546	DOWN
17066961	0.0146	0.000493	4.60656	-0.10149	3.22063	ADAMDEC1	UP
16734849	0.0147	0.000496	4.60323	-0.10753	1.15562	HBD	UP
16960554	0.0149	0.000508	4.5896	-0.13226	1.15712	GPR171	UP
16809659	0.015	0.000509	-4.58849	-0.13428	-1.00095	PRTG	DOWN
16743657	0.0151	0.000514	-4.58359	-0.14317	-1.10877	MMP20	DOWN
16857736	0.0152	0.000518	4.57916	-0.15121	1.94977	MCEMP1	UP
16705287	0.0153	0.000524	-4.57301	-0.1624	-1.38533	LINC01515	DOWN
16979628	0.0153	0.000524	-4.57251	-0.16331	-1.07778	LINC02516	DOWN
16844207	0.0153	0.000525	4.57197	-0.16428	1.65229	IKZF3	UP
16787208	0.0154	0.000529	4.56735	-0.17268	1.88377	GPR65	UP
17000793	0.0154	0.00053	4.56606	-0.17503	1.08029	CD14	UP
17004518	0.0155	0.000536	4.55982	-0.18637	1.16755	LY86	UP
17124446	0.0156	0.000541	-4.55486	-0.19539	-1.20736	DPY19L2P3	DOWN
16931815	0.0157	0.000544	4.55255	-0.19961	1.18146	SHANK3	UP
17046024	0.0157	0.000545	-4.55075	-0.20287	-1.59152	VWC2	DOWN
16940190	0.0159	0.000555	4.54157	-0.21958	1.21976	CCRL2	UP
17049996	0.016	0.00056	4.53639	-0.22902	1.09285	LOC101927902	UP
16861302	0.0161	0.000563	4.53323	-0.23477	1.01142	HCST	UP
16946744	0.0161	0.000564	4.53194	-0.23711	1.67094	CPA3	UP
17016503	0.0161	0.000565	4.53166	-0.23764	1.52974	HIST1H3I	UP
16908305	0.0161	0.000569	4.52765	-0.24495	1.54343	CXCR2P1	UP
16976833	0.0162	0.000571	4.52535	-0.24913	1.11302	CXCL3	UP
16977153	0.0162	0.000571	-4.52514	-0.24952	-1.01703	LOC105377289	DOWN
17004167	0.0163	0.000575	4.5217	-0.25578	2.23189	IRF4	UP
17121270	0.0163	0.000576	-4.52053	-0.25791	-1.12961	TJP1	DOWN
17000591	0.0163	0.000578	4.51916	-0.26041	2.79501	MZB1	UP
16837405	0.0165	0.000588	-4.5095	-0.27803	-1.07296	LINC01152	DOWN
16755173	0.0165	0.000589	4.5085	-0.27985	1.60802	PLXNC1	UP
16976815	0.0165	0.000589	4.50833	-0.28017	1.44651	PF4	UP
17051441	0.0166	0.000593	4.50477	-0.28666	1.13494	STRIP2	UP
16803807	0.0168	0.000606	4.49296	-0.30822	1.04748	IL16	UP
16658690	0.0168	0.000608	4.49115	-0.31153	1.004	PIK3CD	UP
16815355	0.0169	0.000612	4.48778	-0.31769	1.21607	IL32	UP
17111955	0.017	0.000616	4.4838	-0.32495	1.02647	CXCR3	UP
16998532	0.0171	0.000622	4.47883	-0.33403	1.49271	ST8SIA4	UP
16696624	0.0171	0.000624	4.4774	-0.33664	1.13521	TNR	UP
16900148	0.0172	0.000626	4.47505	-0.34095	2.9124	IGKC	UP
16942458	0.0172	0.000627	-4.47403	-0.3428	-1.04373	ADAMTS9-AS2	DOWN
16789149	0.0172	0.00063	4.47143	-0.34755	1.53226	TNFAIP2	UP
17007795	0.0174	0.000636	4.46667	-0.35626	1.05439	DEF6	UP
16869891	0.0177	0.000653	4.4519	-0.38328	1.20523	RASAL3	UP
17109680	0.0179	0.000663	-4.44376	-0.39819	-1.02134	MAP7D2	DOWN
16693409	0.0179	0.000666	4.44156	-0.40222	1.15224	S100A12	UP
16929631	0.018	0.000671	4.43709	-0.4104	1.00091	APOL1	UP
16676150	0.018	0.000672	4.43658	-0.41133	1.38758	BTG2	UP
16814075	0.0182	0.000685	4.42646	-0.42987	1.11994	DDX11L10	UP
16962085	0.0185	0.000696	4.41741	-0.44647	1.70084	KLHL6	UP
17017147	0.0186	0.000701	4.41402	-0.45268	1.25212	HLA-B	UP
17091295	0.0186	0.000704	4.41105	-0.45814	1.11381	MIR126	UP
16838300	0.019	0.000724	4.39619	-0.48541	1.13553	TMC8	UP
16799793	0.019	0.000727	4.39412	-0.4892	1.17494	NUSAP1	UP
16863124	0.019	0.000729	4.39265	-0.4919	1.73353	APOC1	UP
16990553	0.0191	0.000735	4.38761	-0.50117	1.15272	KCTD16	UP
17117778	0.0192	0.000739	4.38514	-0.5057	1.13589	DND1	UP
17117784	0.0192	0.000739	4.38514	-0.5057	1.13589	DND1	UP
17116745	0.0192	0.000743	4.38217	-0.51116	1.29509	P2RY8	UP
17074474	0.0192	0.000744	4.3814	-0.51257	1.02794	MFHAS1	UP
16738630	0.0195	0.000759	4.37083	-0.53199	1.15396	LPXN	UP
16857490	0.0196	0.00076	4.37008	-0.53338	1.28535	VAV1	UP
16900441	0.0196	0.000763	4.36785	-0.53747	1.31486	DUSP2	UP
17011555	0.0197	0.000764	-4.36659	-0.5398	-1.71067	CCDC162P	DOWN
16967794	0.0197	0.000767	4.36487	-0.54295	1.43194	CXCL1	UP
16791444	0.0198	0.000775	4.3592	-0.55337	1.03044	GZMB	UP
16667119	0.0199	0.00078	-4.35539	-0.56039	-1.19242	KIAA1107	DOWN
16850216	0.0199	0.000784	4.35271	-0.56532	1.27371	SECTM1	UP
16846218	0.02	0.000793	4.34674	-0.5763	1.14961	HOXB2	UP
17057016	0.0201	0.0008	-4.34223	-0.58461	-1.53374	LOC105375249	DOWN
16889455	0.0201	0.0008	4.34212	-0.58482	1.00769	CASP10	UP
17117853	0.0203	0.000809	-4.33569	-0.59666	-1.1707	LOC285097	DOWN
16942743	0.0203	0.00081	-4.33547	-0.59707	-1.01904	ROBO2	DOWN
17093694	0.0204	0.000814	4.33257	-0.6024	1.15502	CD72	UP
16810270	0.0204	0.000814	4.33239	-0.60274	1.01606	C2CD4B	UP
16715699	0.0204	0.000817	4.33056	-0.6061	1.70267	C10orf55	UP
16689020	0.0204	0.000817	-4.33029	-0.6066	-1.05048	MCOLN3	DOWN
16797563	0.0205	0.000822	4.32731	-0.6121	2.93477	IGHG1	UP
16665588	0.0205	0.000828	-4.32335	-0.61938	-1.18399	ROR1	DOWN
16944673	0.0206	0.000831	4.32143	-0.62292	1.50574	PARP15	UP
16809549	0.0206	0.000835	-4.31876	-0.62785	-1.31695	WDR72	DOWN
16949403	0.0207	0.00084	4.31589	-0.63314	1.19939	ST6GAL1	UP
17073511	0.0208	0.000846	4.31176	-0.64075	1.05663	SPATC1	UP
17123148	0.0208	0.000847	-4.31129	-0.64163	-1.27004	SATB1-AS1	DOWN
17123146	0.0208	0.000849	-4.30979	-0.6444	-1.20367	SATB1-AS1	DOWN
16740997	0.021	0.000856	4.30511	-0.65303	1.5933	PTPRCAP	UP
16782114	0.021	0.000859	4.30336	-0.65624	1.49621	YME1L1	UP
16865424	0.0211	0.000866	4.29922	-0.66389	2.1977	LILRB4	UP
16725252	0.0212	0.000873	4.29502	-0.67165	3.13756	MS4A1	UP
16968098	0.0212	0.000873	4.29464	-0.67233	3.41062	CXCL13	UP
16900605	0.0212	0.000874	-4.29438	-0.67281	-1.56269	CNNM3-DT	DOWN
16833953	0.0213	0.000877	4.29207	-0.67709	1.08248	CSF3	UP
16750590	0.0213	0.000879	-4.29136	-0.67839	-1.27801	C12orf54	DOWN
16997802	0.0213	0.000882	-4.28935	-0.68211	-1.12892	HAPLN1	DOWN
16779195	0.0216	0.0009	-4.27824	-0.70262	-1.10365	RNASEH2B-AS1	DOWN
16889829	0.0218	0.000911	4.27162	-0.71485	1.04082	ICOS	UP
16896750	0.0218	0.000914	-4.27009	-0.71767	-1.33879	CDKL4	DOWN
16857703	0.0219	0.000918	4.26751	-0.72245	1.21267	STXBP2	UP
17002777	0.0219	0.00092	4.26621	-0.72485	1.0231	STK10	UP
16698466	0.0221	0.000934	4.25848	-0.73913	1.2349	NUAK2	UP
16984801	0.0223	0.000946	4.25126	-0.7525	1.78374	GZMA	UP
17118068	0.0223	0.000949	4.25002	-0.75479	1.285	LOC728488	UP
16862604	0.0225	0.000963	4.2419	-0.7698	2.98783	CD79A	UP
16980051	0.0226	0.000966	-4.24028	-0.77281	-1.12573	CLGN	DOWN
16899401	0.0226	0.00097	4.23773	-0.77753	1.01556	TACR1	UP
16892446	0.0228	0.000979	4.2331	-0.7861	1.38161	INPP5D	UP
16674742	0.0229	0.000988	4.22795	-0.79564	1.44533	NPL	UP
16703851	0.0231	0.001	-4.21999	-0.81037	-1.48681	PARD3-AS1	DOWN
17109358	0.0233	0.00101	-4.21444	-0.82065	-1.66605	LOC102724124	DOWN
16752132	0.0234	0.00102	4.20933	-0.83012	1.25502	MUCL1	UP
16695463	0.0235	0.00103	4.20821	-0.8322	1.02108	ITLN1	UP
16686745	0.0235	0.00103	4.20773	-0.83309	1.01509	CYP4A11	UP
17102538	0.0235	0.00103	4.20578	-0.8367	1.36855	CYBB	UP
16855761	0.0236	0.00104	4.19963	-0.8481	1.04933	CDH19	UP
16688999	0.0237	0.00105	4.19754	-0.85198	1.6305	MCOLN2	UP
16876050	0.0237	0.00105	-4.19667	-0.85358	-1.05346	ZNF418	DOWN
16967286	0.0237	0.00105	4.19568	-0.85543	2.04947	STAP1	UP
16871966	0.0238	0.00105	4.19361	-0.85926	1.607	MAP4K1	UP
16833420	0.0239	0.00106	4.1897	-0.86652	3.45171	CCL4	UP
16765525	0.0241	0.00107	4.18494	-0.87535	1.13937	NFE2	UP
16751438	0.0244	0.0011	4.1729	-0.89769	1.51588	NR4A1	UP
17011562	0.0245	0.0011	-4.1711	-0.90103	-1.23632	CCDC162P	DOWN
16731795	0.0248	0.00112	4.16106	-0.91968	1.67483	CD3E	UP
17099707	0.0248	0.00112	4.16103	-0.91973	1.71902	FCN1	UP
16976827	0.0249	0.00113	4.15694	-0.92733	3.04121	CXCL5	UP
16883733	0.025	0.00113	4.15541	-0.93016	1.10385	IL18RAP	UP
16922459	0.025	0.00113	-4.15478	-0.93133	-1.32328	LINC01426	DOWN
16766416	0.025	0.00113	-4.15392	-0.93294	-1.04254	NEMP1	DOWN
16763608	0.0251	0.00114	4.15163	-0.93719	1.60073	PCED1B-AS1	UP
16857519	0.0254	0.00116	4.14049	-0.9579	1.21119	ADGRE1	UP
16719025	0.0255	0.00117	-4.13768	-0.96311	-1.20028	FGFR2	DOWN
16981099	0.0255	0.00117	-4.13761	-0.96324	-1.14059	NPY1R	DOWN
17011121	0.0258	0.00119	4.12815	-0.98083	1.28252	FHL5	UP
17119702	0.026	0.00121	-4.12106	-0.99403	-1.06773	SNORD54	DOWN
16851259	0.0262	0.00122	4.11654	-1.00243	1.18644	ANKRD30B	UP
16673525	0.0262	0.00122	-4.11444	-1.00633	-1.13371	ATP1B1	DOWN
16907863	0.0264	0.00123	-4.11056	-1.01356	-1.05884	ERBB4	DOWN
16936640	0.0269	0.00127	4.09556	-1.04148	1.6048	LOC105373098	UP
17096423	0.027	0.00128	4.08944	-1.05289	1.42293	HEMGN	UP
16848070	0.0271	0.00128	4.08764	-1.05623	1.31208	SLC16A6	UP
16704264	0.0272	0.0013	4.0811	-1.06843	1.22767	LINC00619	UP
16938205	0.0272	0.0013	-4.08083	-1.06894	-1.03143	SATB1-AS1	DOWN
16707096	0.0273	0.00131	4.07878	-1.07276	1.22113	LIPN	UP
17100888	0.0276	0.00133	-4.06885	-1.09125	-1.60861	LOC102723630	DOWN
17062491	0.0278	0.00135	-4.06084	-1.1062	-1.44318	GPR37	DOWN
16974968	0.0279	0.00135	4.05977	-1.10819	1.65247	SEL1L3	UP
17028326	0.0281	0.00137	4.05396	-1.11903	1.76941	HLA-DQA1	UP
17024265	0.0282	0.00138	-4.04834	-1.12951	-1.26679	TXLNB	DOWN
16931957	0.0283	0.00139	4.04593	-1.134	1.25932	ADA2	UP
17007257	0.0284	0.00139	4.04403	-1.13756	1.03958	HLA-DRA	UP
16890752	0.0287	0.00142	4.03378	-1.15668	1.37004	CXCR2	UP
16791371	0.0287	0.00142	4.03303	-1.15808	1.01541	RIPK3	UP
16747969	0.0288	0.00143	4.03186	-1.16027	1.57725	CLEC4D	UP
16864651	0.0292	0.00146	4.01915	-1.18399	1.71589	SIGLEC7	UP
17094678	0.0293	0.00147	4.01623	-1.18945	1.52711	LINC01506	UP
16695392	0.0297	0.0015	4.00496	-1.21051	1.72721	SLAMF6	UP
16889819	0.0298	0.00151	4.00279	-1.21456	1.18303	CTLA4	UP
16927827	0.0298	0.00151	4.0013	-1.21734	2.19156	IGLC1	UP
16730569	0.0303	0.00156	-3.98254	-1.25241	-1.40662	LOC101928477	DOWN
16871915	0.0306	0.00159	3.97498	-1.26656	1.09352	PPP1R14A	UP
16797459	0.0308	0.0016	3.97171	-1.27266	2.85451	IGHM	UP
16864751	0.0308	0.0016	3.97024	-1.27543	1.61886	FPR2	UP
17105082	0.0312	0.00163	3.96176	-1.29128	1.5843	GPR174	UP
16695437	0.0312	0.00163	3.96134	-1.29208	1.63336	CD48	UP
17123058	0.0312	0.00163	-3.96006	-1.29448	-1.0688	ZDHHC8P1	DOWN
16990267	0.0313	0.00164	-3.95802	-1.29829	-1.02733	PCDHB5	DOWN
17118778	0.0315	0.00166	3.95111	-1.31122	1.00178	SNORA52	UP
16721905	0.0316	0.00167	3.947	-1.31892	1.01238	ADM	UP
16876812	0.0317	0.00168	3.94404	-1.32447	1.3765	LINC01871	UP
16920651	0.032	0.0017	3.93795	-1.33586	1.57782	ZBP1	UP
17022545	0.0321	0.00171	-3.93633	-1.33889	-1.07163	METTL24	DOWN
16789790	0.0323	0.00172	3.93147	-1.348	2.32907	FAM30A	UP
16849496	0.0323	0.00173	3.93023	-1.35032	1.1249	LINC02081	UP
16760889	0.0324	0.00173	3.92954	-1.35161	1.06412	C3AR1	UP
16819563	0.0325	0.00174	3.9267	-1.35694	1.9762	ADGRG3	UP
17078592	0.0325	0.00174	3.92591	-1.35841	1.36066	FABP4	UP
16701007	0.0327	0.00176	-3.92056	-1.36843	-1.28176	LINC01139	DOWN
17105076	0.0328	0.00177	3.91664	-1.37579	1.7513	P2RY10	UP
16884050	0.0334	0.00182	-3.90235	-1.40256	-1.34452	SULT1C4	DOWN
16723058	0.0338	0.00185	-3.89237	-1.42128	-1.07538	FIBIN	DOWN
16758998	0.0339	0.00186	-3.88953	-1.42661	-1.03254	LINC02350	DOWN
16976798	0.0341	0.00189	3.88293	-1.43899	1.95605	RASSF6	UP
16933049	0.0342	0.0019	3.87978	-1.4449	1.39286	VPREB3	UP
16997638	0.0352	0.00197	3.85946	-1.48303	1.23033	LOC644936	UP
16705295	0.0358	0.00201	-3.84873	-1.50316	-1.44786	LRRTM3	DOWN
16718670	0.0358	0.00202	-3.84772	-1.50506	-1.04875	GFRA1	DOWN
16731806	0.0358	0.00202	3.84721	-1.50602	1.39193	CD3G	UP
16798236	0.036	0.00204	-3.84135	-1.51703	-1.08754	SNORD116-29	DOWN
16797508	0.0362	0.00206	3.83692	-1.52535	1.20105	IGHM	UP
16690754	0.0364	0.00207	3.83399	-1.53084	1.28756	KCNA3	UP
17105766	0.0366	0.00209	-3.82842	-1.54131	-1.01593	MORF4L2-AS1	DOWN
16774264	0.0369	0.00211	-3.82343	-1.55069	-1.09543	LOC101929140	DOWN
16984783	0.0369	0.00212	3.82207	-1.55324	1.77587	GZMK	UP
17101923	0.037	0.00212	-3.82082	-1.55559	-1.14542	PPEF1	DOWN
17111008	0.037	0.00213	-3.82034	-1.55649	-1.42397	NUDT11	DOWN
17005113	0.0371	0.00213	-3.81868	-1.5596	-1.14048	STMND1	DOWN
16798688	0.0371	0.00214	-3.81809	-1.56072	-1.04911	ULK4P3	DOWN
17101081	0.0373	0.00215	3.81473	-1.56703	1.12505	CSF2RA	UP
16730576	0.0376	0.00218	-3.80805	-1.57959	-1.28601	LOC101928477	DOWN
16781904	0.0376	0.00218	3.80603	-1.58337	1.03241	TRDV2	UP
17038609	0.0377	0.0022	3.80356	-1.58803	1.73816	HLA-DQA1	UP
17007048	0.0386	0.00228	3.78449	-1.62388	1.44216	C4A	UP
17105163	0.0387	0.00229	-3.78101	-1.63042	-1.12798	ZNF711	DOWN
16782058	0.0389	0.0023	3.7789	-1.63439	1.83507	YME1L1	UP
16798194	0.0392	0.00233	-3.77276	-1.64593	-1.63159	SNORD116-16	DOWN
17110527	0.0392	0.00233	-3.7712	-1.64886	-1.00053	ZNF630	DOWN
16839194	0.0401	0.00241	3.75381	-1.68159	1.23501	DOC2B	UP
16736224	0.0402	0.00242	-3.75268	-1.68371	-1.08308	SNORD14A	DOWN
16788576	0.0407	0.00247	-3.74217	-1.70349	-1.72787	SNORD113-3	DOWN
16750190	0.0409	0.00249	3.73711	-1.71301	1.17632	PDZRN4	UP
16725210	0.0415	0.00254	3.72594	-1.73402	1.12644	MS4A7	UP
16900152	0.0424	0.00263	3.70915	-1.76565	2.88467	IGKC	UP
16798216	0.0426	0.00265	-3.70546	-1.77259	-1.35621	SNORD116-24	DOWN
17047382	0.0426	0.00265	-3.70442	-1.77454	-1.5208	TRIM74	DOWN
17125722	0.0427	0.00266	-3.70235	-1.77844	-1.13932	ANOS1	DOWN
17123522	0.0429	0.00268	3.69952	-1.78377	1.29953	LINC01094	UP
16982085	0.0429	0.00268	3.69828	-1.78611	1.01818	MIR3945HG	UP
16933766	0.0431	0.0027	3.69555	-1.79125	1.4349	OSM	UP
16863737	0.0431	0.0027	3.69441	-1.7934	1.05331	CARD8-AS1	UP
16981810	0.0437	0.00275	-3.68419	-1.81265	-1.20086	LINC00290	DOWN
16871202	0.0441	0.0028	-3.6753	-1.82939	-1.12402	RHPN2	DOWN
16781821	0.0444	0.00283	3.67061	-1.83824	1.07582	YME1L1	UP
16695994	0.0444	0.00283	3.66953	-1.84026	1.00058	CD247	UP
16966169	0.045	0.00289	-3.65975	-1.85869	-1.02326	LOC105374419	DOWN
16709936	0.0452	0.00291	3.65563	-1.86645	1.5107	PLPP4	UP
17126096	0.0452	0.00291	3.65549	-1.86672	2.79153	IGHG1	UP
16996813	0.0459	0.00299	3.64049	-1.895	1.55776	CD180	UP
16870776	0.0461	0.00301	-3.63715	-1.90129	-1.07006	ZNF826P	DOWN
16769690	0.0463	0.00304	3.63203	-1.91093	1.01581	CMKLR1	UP
16857766	0.0464	0.00305	-3.6309	-1.91305	-1.26954	CLEC4GP1	DOWN
16823309	0.0464	0.00306	3.62915	-1.91635	1.19305	MEFV	UP
16886382	0.0467	0.0031	-3.62313	-1.9277	-1.41573	KIF5C	DOWN
16798242	0.0467	0.0031	-3.62159	-1.9306	-1.02394	SNORD116-30	DOWN
16736821	0.0472	0.00317	-3.61104	-1.9505	-1.21512	LGR4	DOWN
17046412	0.0476	0.0032	-3.60547	-1.961	-1.11523	ZNF727	DOWN
16781860	0.0483	0.00327	3.59479	-1.98114	1.22735	YME1L1	UP
17125718	0.0485	0.00329	-3.59065	-1.98895	-1.02681	ANOS1	DOWN
16999432	0.0485	0.0033	-3.59025	-1.9897	-1.22552	C5orf63	DOWN
16761293	0.0485	0.0033	3.59021	-1.98978	1.46353	OLR1	UP
16933062	0.0486	0.0033	3.58921	-1.99166	1.64341	DERL3	UP
16749935	0.0487	0.00331	-3.58758	-1.99472	-1.03732	LINC02471	DOWN
16797433	0.0487	0.00331	3.58729	-1.99528	3.07564	IGHM	UP
16877830	0.0489	0.00333	3.58465	-2.00026	2.22047	LOC101929272	UP
17112137	0.0489	0.00334	-3.58364	-2.00217	-1.01235	NAP1L2	DOWN
16781986	0.0491	0.00336	-3.57995	-2.00911	-1.70787	YME1L1	DOWN
16764758	0.0492	0.00337	-3.57805	-2.01269	-1.08272	GALNT6	DOWN
17097653	0.0492	0.00338	3.57772	-2.01332	1.1127	TNFSF8	UP
16862572	0.0492	0.00338	3.57666	-2.01533	1.28804	CEACAM3	UP
17112735	0.0494	0.00341	3.57311	-2.02202	1.26247	BTK	UP
16900144	0.0499	0.00347	3.5633	-2.04051	2.45866	IGKC	UP
17125920	0.0499	0.00347	-3.5632	-2.0407	-1.15909	MIR193BHG	DOWN
